# Supplementary material for: Gene expression atlas for the food security crop cassava
Source: PubMed Central journal article supplement (PMC5516207; doi:10.1111/nph.14443), 2017-01-24
Supplement: NPH-213-1632-s002.pdf [file NPH-213-1632-s002.pdf]

# tissue\_specific\_rnaseq\_analysis\_jupyter\_notebook

December 19, 2016

## 1 Supporting Information Notes S1. Documentation of data analysis.

Custom Python code was used in a Jupyter notebook using the Pandas, NumPy, Seaborn, and SciPy packages to organize, process, and display the data.

### 1.0.1 Files Required in this Notebook and their Source:

|                 | <u>Purpose</u>                          | <u>File</u> | <u>Source</u>           |
|-----------------|-----------------------------------------|-------------|-------------------------|
| Annotation      | Mesculenta_305_v6.1.annotation_info.txt |             | Phytozome10.3           |
| Gene Expression | gene_exp.diff                           |             | Cuffdiff                |
| Gene Expression | genes.read_group_tracking               |             | Cuffdiff                |
| GO Enrichment   | 4.genes_nodes_mean_exp.txt              |             | SOM Clustering Analysis |

```
In [1]: import sys,os

import pandas as pd                # version 0.17.0
import numpy as np                 # version 1.11.0
import seaborn as sns              # version 0.7.0
import matplotlib.pyplot as plt    # version 1.5.1

from scipy.stats import percentileofscore as percentileofscore
# version 0.16.0

%matplotlib inline
```

```
In [2]: os.chdir('tissue_specific_rnaseq/')
```

### 1.1 Annotation

```
In [3]: # read in annotations for AM560-2 assembly version 6.1
annot = pd.read_table('Mesculenta_305_v6.1.annotation_info.txt',
                      sep='\t', header=None)

# limit table to specific columns
# and drop any duplicates that may be present
annot = annot[[1,5,9,10,12]].drop_duplicates(subset=1).rename(
    columns={1:'gene',5:'PTHR',9:'go',10:'TAIR',12:'annot'})

# for the genes that do not have an arabidopsis functional annotation,
# use the PANTHER functional annotation provided where possible
annot['annot'][annot['annot'].isnull()] = annot['PTHR']
```

```

# drop the PANTHER column
annot = annot.dropna(axis=0, subset=['annot']).drop(['PTHR'], axis=1)

df_go = annot[['go', 'gene']].dropna().set_index('gene')['go']
df_go = df_go.str.split(',').apply(pd.Series,1).stack()
df_go.index = df_go.index.droplevel(-1)
df_go.name = 'go'

annot.columns

```

Out[3]: Index(['gene', 'go', 'TAIR', 'annot'], dtype='object')

In [4]: print('Annotated Gene Count: {}'.format(annot.shape[0]) )

Annotated Gene Count: 26015

## 1.2 Read in Data

```

In [5]: # read in data
df_cuff = pd.read_table( 'gene_exp.diff',
                        sep='\t', index_col=0)

# Create dataframe to hold all duplicated genes (defined as
# genes containing)
df_dups = df_cuff.drop_duplicates(['gene_id', 'gene'])['gene']
df_shiny = df_dups.str.split(',').apply(pd.Series,1).stack()

df_dups = df_dups[df_dups.str.contains(',')
                  ].str.split(',').apply(pd.Series,1).stack()
df_dups.index = df_dups.index.droplevel(-1)
df_shiny.index = df_shiny.index.droplevel(-1)
df_shiny.name = 'gene'

df_cuff['gene'] = df_cuff['gene'].str.replace(r',.*', '')

df_cuff.columns

```

Out[5]: Index(['gene\_id', 'gene', 'locus', 'sample\_1', 'sample\_2', 'status', 'value\_1', 'value\_2', 'log2(fold\_change)', 'test\_stat', 'p\_value', 'q\_value', 'significant'], dtype='object')

```

In [6]: # create dataframe containing each gene in one row with its
# expression values in each tissue type
df_cuff_exp = pd.concat([
    df_cuff[['gene_id',
            'gene',
            'locus',
            'sample_1',
            'value_1']].rename(columns={'sample_1': 'sample',
                                       'value_1': 'value'}),

```

```

df_cuff[['gene_id',
        'gene',
        'locus',
        'sample_2',
        'value_2']].rename(columns={'sample_2':'sample',
                                   'value_2':'value'}),
)].drop_duplicates().pivot(index='gene_id',
                           columns='sample',
                           values='value')

# reorganize column names with similar tissues near each other
tissue_order = ['Leaf', 'Mid_Vein', 'Petiole', 'Stem', 'Lateral_Bud', 'SAM',
                'Storage_Root', 'Fibrous_Root', 'RAM',
                'OES', 'FEC'
                ]
df_cuff_exp = df_cuff_exp.loc[:,tissue_order]

df_cuff_exp.columns

```

```

Out[6]: Index(['Leaf', 'Mid_Vein', 'Petiole', 'Stem', 'Lateral_Bud', 'SAM',
              'Storage_Root', 'Fibrous_Root', 'RAM', 'OES', 'FEC'],
             dtype='object', name='sample')

```

```

In [7]: # remove all rows with all 0's, with no annotation
# merge expression data with annotation data and
# only keep genes that have been annotated
df_cuff_ann_all = df_cuff_exp.merge(
    df_cuff[['gene_id', 'gene', 'locus']],
    left_index=True,
    right_on='gene_id',
    copy=False).drop_duplicates()

# drop all denovo genes
df_cuff_ann_all = df_cuff_ann_all[df_cuff_ann_all['gene'] != '-']

# add annotation (gene names)
df_cuff_ann_all = df_cuff_ann_all.merge(annot[['gene', 'annot']],
                                       how='left',
                                       on='gene',
                                       copy=False)

# drop all genes that do not have an annotation
df_cuff_ann = df_cuff_ann_all.dropna()

# drop genes with lower than 0 mean expression
df_cuff_ann = df_cuff_ann[df_cuff_ann.mean(axis=1) > 0]
df_cuff_ann.columns

```

```

Out[7]: Index(['Leaf', 'Mid_Vein', 'Petiole', 'Stem', 'Lateral_Bud', 'SAM',
              'Storage_Root', 'Fibrous_Root', 'RAM', 'OES', 'FEC', 'gene_id', 'gene',
              'locus', 'annot'],
             dtype='object', name='sample')

```

```

In [8]: # read data from genes.read_group_tracking file
genes_rgt = pd.read_table('genes.read_group_tracking')

```

```

# merge condition and replicate columns to pivot table on
genes_rgt['pivot'] = genes_rgt['condition'] + genes_rgt['replicate'].astype(str)

# pivot table to look at expression values for each replicate per gene
genes_rgt_piv = genes_rgt.pivot(index='tracking_id',
                                columns='pivot',
                                values='FPKM')

# merge with gene names
genes_rgt_piv = genes_rgt_piv.merge(df_cuff.loc[:, ['gene_id',
                                                    'gene'
                                                    ]].drop_duplicates(),
                                   left_index=True,
                                   right_on='gene_id')

# Merge with functional annotations
genes_rgt_piv = genes_rgt_piv.merge(annot,
                                   on='gene',
                                   how='left').set_index('gene_id')

genes_rgt_piv['gene_id'] = genes_rgt_piv.index

# for later analyses, prep tissue to index dictionary
tissue_rep_index = {'FEC':[0,1,2],
                   'Fibrous_Root':[3,4,5],
                   'Lateral_Bud':[6,7,8],
                   'Leaf':[9,10,11],
                   'Mid_Vein':[12,13,14],
                   'OES':[15,16,17],
                   'Petiole':[18,19,20],
                   'RAM':[21,22,23],
                   'SAM':[24,25,26],
                   'Stem':[27,28,29],
                   'Storage_Root':[30,31]
                   }

genes_rgt_piv.columns

```

```

Out [8]: Index(['FEC0', 'FEC1', 'FEC2', 'Fibrous_Root0', 'Fibrous_Root1',
               'Fibrous_Root2', 'Lateral_Bud0', 'Lateral_Bud1', 'Lateral_Bud2',
               'Leaf0', 'Leaf1', 'Leaf2', 'Mid_Vein0', 'Mid_Vein1', 'Mid_Vein2',
               'OES0', 'OES1', 'OES2', 'Petiole0', 'Petiole1', 'Petiole2', 'RAM0',
               'RAM1', 'RAM2', 'SAM0', 'SAM1', 'SAM2', 'Stem0', 'Stem1', 'Stem2',
               'Storage_Root0', 'Storage_Root1', 'gene', 'go', 'TAIR', 'annot',
               'gene_id'],
              dtype='object', name='pivot')

```

```

In [9]: #####
# RSHINY APP FILE PREP ##
# print files for RShiny App
df_temp = genes_rgt_piv[genes_rgt_piv.gene != '-'].drop_duplicates().copy()
del df_temp['gene']
df_temp = df_temp.merge(pd.DataFrame(df_shiny),

```

```

        how='left',
        left_index=True,
        right_index=True )

df_temp['possible_issues'] = df_temp['gene'].isin(df_dups)

print(df_temp.shape)
df_temp.to_csv('mesculenta_v6_output/Rshiny_app_dataset.txt',
               sep='\t', index=False)

## Print genes with multiple associated annotations
df_dups.to_csv('mesculenta_v6_output/warning_genes.txt',
               index=False, header=False)
print( df_dups.shape )

```

```

(35200, 38)
(4531,)

```

## 2 SOM Clustering with GO Enrichment

### 2.1 Find all genes with at least one significantly differentially expressed pairwise comparison

This data is for use in an analysis in R to identify gene expression clusters using a self organizing map

```

In [10]: # write to file all gene names with a statistically significant pairwise
#         difference where one of the pairs is expressed greater than 1 FPKM
df_gene_ids = pd.DataFrame(df_cuff[(df_cuff['q_value'] <= 0.05)
                                   & ((df_cuff['value_1'] > 1) | (df_cuff['value_2'] > 1))
                                   ].loc[:, ['gene_id', 'gene']].drop_duplicates().index)
df_gene_ids.to_csv('mesculenta_v6_output/0.cassava_diff_genes.txt',
                  index=False, sep='\t')

```

```

In [11]: # write to file all genes with at least one tissue expressed
#         greater than 1 FPKM for use as background in the GO analysis
# print to file expression values for all genes expressed > 1FPKM
genes_rgt_piv.iloc[:, :32].to_csv('./mesculenta_v6_output/1.cassava_exp.txt',
                                  sep='\t')

# print to file expression values with functional annotations
genes_rgt_piv.drop('go', axis=1
                  ).to_csv('./mesculenta_v6_output/2.cassava_annotation.txt',
                           sep='\t')

```

## 3 Parse and Trim goatools GO Terms from R Cluster Analysis

A python tool called goatools was used to create the files being read in this section. The 4 nodes are based on a self organizing map from an R analysis to cluster genes by expression profile

### 3.0.1 GO PREP

#### Split Genes into Files by node

```
In [12]: df_pcanodes = pd.read_table('4.genes_nodes_mean_exp.txt',
                                     sep='\t', usecols = ['test_id', 'node'])

print(df_pcanodes.shape)
```

(14426, 2)

```
In [13]: ## READ IN NODE DATA FROM DAN'S ANALYSIS
df_node1 = df_pcanodes[df_pcanodes['node'] == 1
                       ].merge(df_cuff.loc[:, ['gene']].drop_duplicates(),
                               left_on='test_id',
                               right_index=True
                              )
df_node2 = df_pcanodes[df_pcanodes['node'] == 2
                       ].merge(df_cuff.loc[:, ['gene']].drop_duplicates(),
                               left_on='test_id',
                               right_index=True
                              )
df_node3 = df_pcanodes[df_pcanodes['node'] == 3
                       ].merge(df_cuff.loc[:, ['gene']].drop_duplicates(),
                               left_on='test_id',
                               right_index=True
                              )
df_node4 = df_pcanodes[df_pcanodes['node'] == 4
                       ].merge(df_cuff.loc[:, ['gene']].drop_duplicates(),
                               left_on='test_id',
                               right_index=True
                              )

## PRINT NODE COUNTS TO SCREEN
print('node1 counts: {}'.format(df_node1.shape[0]))
print('node2 counts: {}'.format(df_node2.shape[0]))
print('node3 counts: {}'.format(df_node3.shape[0]))
print('node4 counts: {}'.format(df_node4.shape[0]))

## PRINT GO PREP GENE NAMES TO FILE
df_cuff[(df_cuff['q_value'] <= 0.05)
        & ((df_cuff['value_1'] > 1) | (df_cuff['value_2'] > 1))]
        .loc[:, ['gene_id', 'gene']]
        .drop_duplicates()['gene'].to_csv('goprep_pcasom_bkgrnd.txt',
                                          index=False, sep='\t')

df_cuff[((df_cuff['value_1'] > 1) | (df_cuff['value_2'] > 1))]
        .loc[:, ['gene_id', 'gene']]
        .drop_duplicates()['gene'].to_csv('goprep_pcasom_bkgrnd_all.txt',
                                          index=False, sep='\t')

df_node1['gene'].to_csv('goprep_pcasom_node1.txt',
                       index=False, sep='\t')
df_node2['gene'].to_csv('goprep_pcasom_node2.txt',
                       index=False, sep='\t')
df_node3['gene'].to_csv('goprep_pcasom_node3.txt',
```

```

                                index=False, sep='\t' )
df_node4['gene'].to_csv('goprep_pcasom_node4.txt',
                        index=False, sep='\t' )

```

```

node1 counts: 2672
node2 counts: 2672
node3 counts: 2914
node4 counts: 3727

```

### 3.0.2 NODE1

```

In [14]: node1_df = pd.read_table('pcasom_node1_goatools_noprop.txt', skiprows=2)

# GO Term list before limiting by significance
print('Before significance filtering')
print('GO Count: {}'.format(node1_df.shape[0]))
print('Fraction of enriched genes: {:.2f}'.format(
    node1_df[node1_df['enrichment'] == 'e'].shape[0]/node1_df.shape[0]))

# limit GO Terms by FDR corrected p value
node1_df = node1_df[node1_df['p_fdr'] < 0.001]

# GO Term list before limiting by significance
print('\nAfter significance filtering')
print('GO Count: {}'.format(node1_df.shape[0]))
print('Fraction of enriched genes: {:.2f}'.format(
    node1_df[node1_df['enrichment'] == 'e'].shape[0]/node1_df.shape[0]))

node1_df = node1_df[node1_df['enrichment'] == 'e']

node1_df.to_csv('pcasom_node1_goenrichment.txt', sep='\t', index=False)

df_node1_gotags = node1_df.loc[:, 'id']

node1_df.columns

```

```

Before significance filtering
GO Count: 155
Fraction of enriched genes: 0.84

```

```

After significance filtering
GO Count: 35
Fraction of enriched genes: 0.80

```

```

Out[14]: Index(['id', 'enrichment', 'description', 'ratio_in_study', 'ratio_in_pop',
               'p_uncorrected', 'p_bonferroni', 'p_holm', 'p_sidak', 'p_fdr'],
              dtype='object')

```

### 3.0.3 NODE2

```

In [15]: node2_df = pd.read_table('pcasom_node2_goatools_noprop.txt', skiprows=2)

```

```

# GO Term list before limiting by significance
print('Before significance filtering')
print('GO Count: {}'.format(node2_df.shape[0]))
print('Fraction of enriched genes: {:.2f}'.format(
    node2_df[node2_df['enrichment'] == 'e'].shape[0]/node2_df.shape[0]))

# limit GO Terms by FDR corrected p value
node2_df = node2_df[node2_df['p_fdr'] < 0.01]

# GO Term list before limiting by significance
print('\nAfter significance filtering')
print('GO Count: {}'.format(node2_df.shape[0]))
print('Fraction of enriched genes: {:.2f}'.format(
    node2_df[node2_df['enrichment'] == 'e'].shape[0]/node2_df.shape[0]))

node2_df = node2_df[node2_df['enrichment'] == 'e']

node2_df.to_csv('pcasom_node2_goenrichment.txt', sep='\t', index=False)

df_node2_gotags = node2_df.loc[:, 'id']

node2_df.columns

```

```

Before significance filtering
GO Count: 84
Fraction of enriched genes: 0.58

```

```

After significance filtering
GO Count: 6
Fraction of enriched genes: 0.50

```

```

Out[15]: Index(['id', 'enrichment', 'description', 'ratio_in_study', 'ratio_in_pop',
               'p_uncorrected', 'p_bonferroni', 'p_holm', 'p_sidak', 'p_fdr'],
              dtype='object')

```

### 3.0.4 NODE3

```

In [16]: node3_df = pd.read_table('pcasom_node3_goatools_noprop.txt', skiprows=2)

```

```

# GO Term list before limiting by significance
print('Before significance filtering')
print('GO Count: {}'.format(node3_df.shape[0]))
print('Fraction of enriched genes: {:.2f}'.format(
    node3_df[node3_df['enrichment'] == 'e'].shape[0]/node3_df.shape[0]))

# limit GO Terms by FDR corrected p value
node3_df = node3_df[node3_df['p_fdr'] < 0.001]

# GO Term list before limiting by significance
print('\nAfter significance filtering')
print('GO Count: {}'.format(node3_df.shape[0]))
print('Fraction of enriched genes: {:.2f}'.format(
    node3_df[node3_df['enrichment'] == 'e'].shape[0]/node3_df.shape[0]))

```



```

node3_df = node3_df[node3_df['enrichment'] == 'e']

node3_df.to_csv('pcasom_node3_goenrichment.txt', sep='\t', index=False)

df_node3_gotags = node3_df.loc[:, 'id']

node3_df.columns

```

Before significance filtering  
GO Count: 92  
Fraction of enriched genes: 0.71

After significance filtering  
GO Count: 10  
Fraction of enriched genes: 0.60

```

Out[16]: Index(['id', 'enrichment', 'description', 'ratio_in_study', 'ratio_in_pop',
               'p_uncorrected', 'p_bonferroni', 'p_holm', 'p_sidak', 'p_fdr'],
              dtype='object')

```

### 3.0.5 NODE4

```

In [17]: node4_df = pd.read_table('pcasom_node4_goatools_noprop.txt', skiprows=2)

# GO Term list before limiting by significance
print('Before significance filtering')
print('GO Count: {}'.format(node4_df.shape[0]))
print('Fraction of enriched genes: {:.2f}'.format(
    node4_df[node4_df['enrichment'] == 'e'].shape[0]/node4_df.shape[0]))

# limit GO Terms by FDR corrected p value
node4_df = node4_df[node4_df['p_fdr'] < 0.001]

# GO Term list before limiting by significance
print('\nAfter significance filtering')
print('GO Count: {}'.format(node4_df.shape[0]))
print('Fraction of enriched genes: {:.2f}'.format(
    node4_df[node4_df['enrichment'] == 'e'].shape[0]/node4_df.shape[0]))

node4_df = node4_df[node4_df['enrichment'] == 'e']

node4_df.to_csv('pcasom_node4_goenrichment.txt', sep='\t', index=False)

df_node4_gotags = node4_df.loc[:, 'id']

node4_df.columns

```

Before significance filtering  
GO Count: 156  
Fraction of enriched genes: 0.77

After significance filtering

GO Count: 19

Fraction of enriched genes: 0.68

```
Out[17]: Index(['id', 'enrichment', 'description', 'ratio_in_study', 'ratio_in_pop',  
              'p_uncorrected', 'p_bonferroni', 'p_holm', 'p_sidak', 'p_fdr'],  
              dtype='object')
```

## Plotting the expression values of node clustered genes

```
In [18]: #####  
        ### NODE 1 ###  
        #####  
        df_node1_plot = df_node1.copy()  
        print('node1 preGO: {}'.format(df_node1_plot.shape[0]))  
  
        df_node1_plot = df_node1_plot.merge(pd.DataFrame(df_go),  
                                           left_on='gene',  
                                           right_index=True  
                                           ).dropna()  
  
        df_node1_plot = df_node1_plot[df_node1_plot['go'].isin(df_node1_gotags)  
                                     ].loc[:,['test_id', 'gene']].drop_duplicates()  
  
        print('node1 postGO: {}'.format(df_node1_plot.shape[0]))  
  
        #####  
        ### NODE 2 ###  
        #####  
        df_node2_plot = df_node2.copy()  
        print('node2 preGO: {}'.format(df_node2_plot.shape[0]))  
  
        df_node2_plot = df_node2_plot.merge(pd.DataFrame(df_go),  
                                           left_on='gene',  
                                           right_index=True  
                                           ).dropna()  
  
        df_node2_plot = df_node2_plot[df_node2_plot['go'].isin(df_node2_gotags)  
                                     ].loc[:,['test_id', 'gene']].drop_duplicates()  
  
        print('node2 postGO: {}'.format(df_node2_plot.shape[0]))  
  
        #####  
        ### NODE 3 ###  
        #####  
        df_node3_plot = df_node3.copy()  
        print('node3 preGO: {}'.format(df_node3_plot.shape[0]))  
  
        df_node3_plot = df_node3_plot.merge(pd.DataFrame(df_go),  
                                           left_on='gene',  
                                           right_index=True  
                                           ).dropna()  
  
        df_node3_plot = df_node3_plot[df_node3_plot['go'].isin(df_node3_gotags)
```

```

].loc[:, ['test_id', 'gene']].drop_duplicates()

print('node3 postGO: {}'.format(df_node3_plot.shape[0]))

#####
### NODE 4 ###
#####
df_node4_plot = df_node4.copy()
print('node4 preGO: {}'.format(df_node4_plot.shape[0]))

df_node4_plot = df_node4_plot.merge(pd.DataFrame(df_go),
                                   left_on='gene',
                                   right_index=True
                                   ).dropna()

df_node4_plot = df_node4_plot[df_node4_plot['go'].isin(df_node4_gotags)
                              ].loc[:, ['test_id', 'gene']].drop_duplicates()

print('node4 postGO: {}'.format(df_node4_plot.shape[0]))

```

```

node1 preGO: 2672
node1 postGO: 474
node2 preGO: 2672
node2 postGO: 186
node3 preGO: 2914
node3 postGO: 638
node4 preGO: 3727
node4 postGO: 337

```

### 3.0.6 Plot SOM Nodes in order

```

In [19]: df_nodeplot = pd.concat([df_node1_plot,
                                df_node2_plot,
                                df_node3_plot,
                                df_node4_plot])

df_nodeplot = df_nodeplot.merge(df_cuff_exp,
                                left_on = 'test_id',
                                right_index = True)

print(df_nodeplot.shape)

(1635, 13)

In [20]: # Plot log expression values for increased contrast
df_plot_log = df_nodeplot.drop(['test_id', 'gene'], axis=1).copy()
df_plot_log = np.log2(df_plot_log + 1)

with( sns.plotting_context( 'talk' ) ):
    plt.figure(figsize=(10,10))
    sns.set_style('darkgrid')

    g = sns.heatmap(df_plot_log, cmap='PuBuGn', yticklabels=False)

```

```

g.set_ylabel('Gene')
g.set_xlabel('Tissue Type')
g.set_title('Genes Specifically Expressed in One of Eleven Tissue Types\
Organized by SOM Node')
g.set_xticklabels(df_plot_log.columns,rotation=30)

plt.savefig('./mesculenta_v6_output/SOM_go_enrichment_heatmap.pdf',
            bbox_inches='tight')

```

Genes Specifically Expressed in One of Eleven Tissue Types Organized by SOM Node

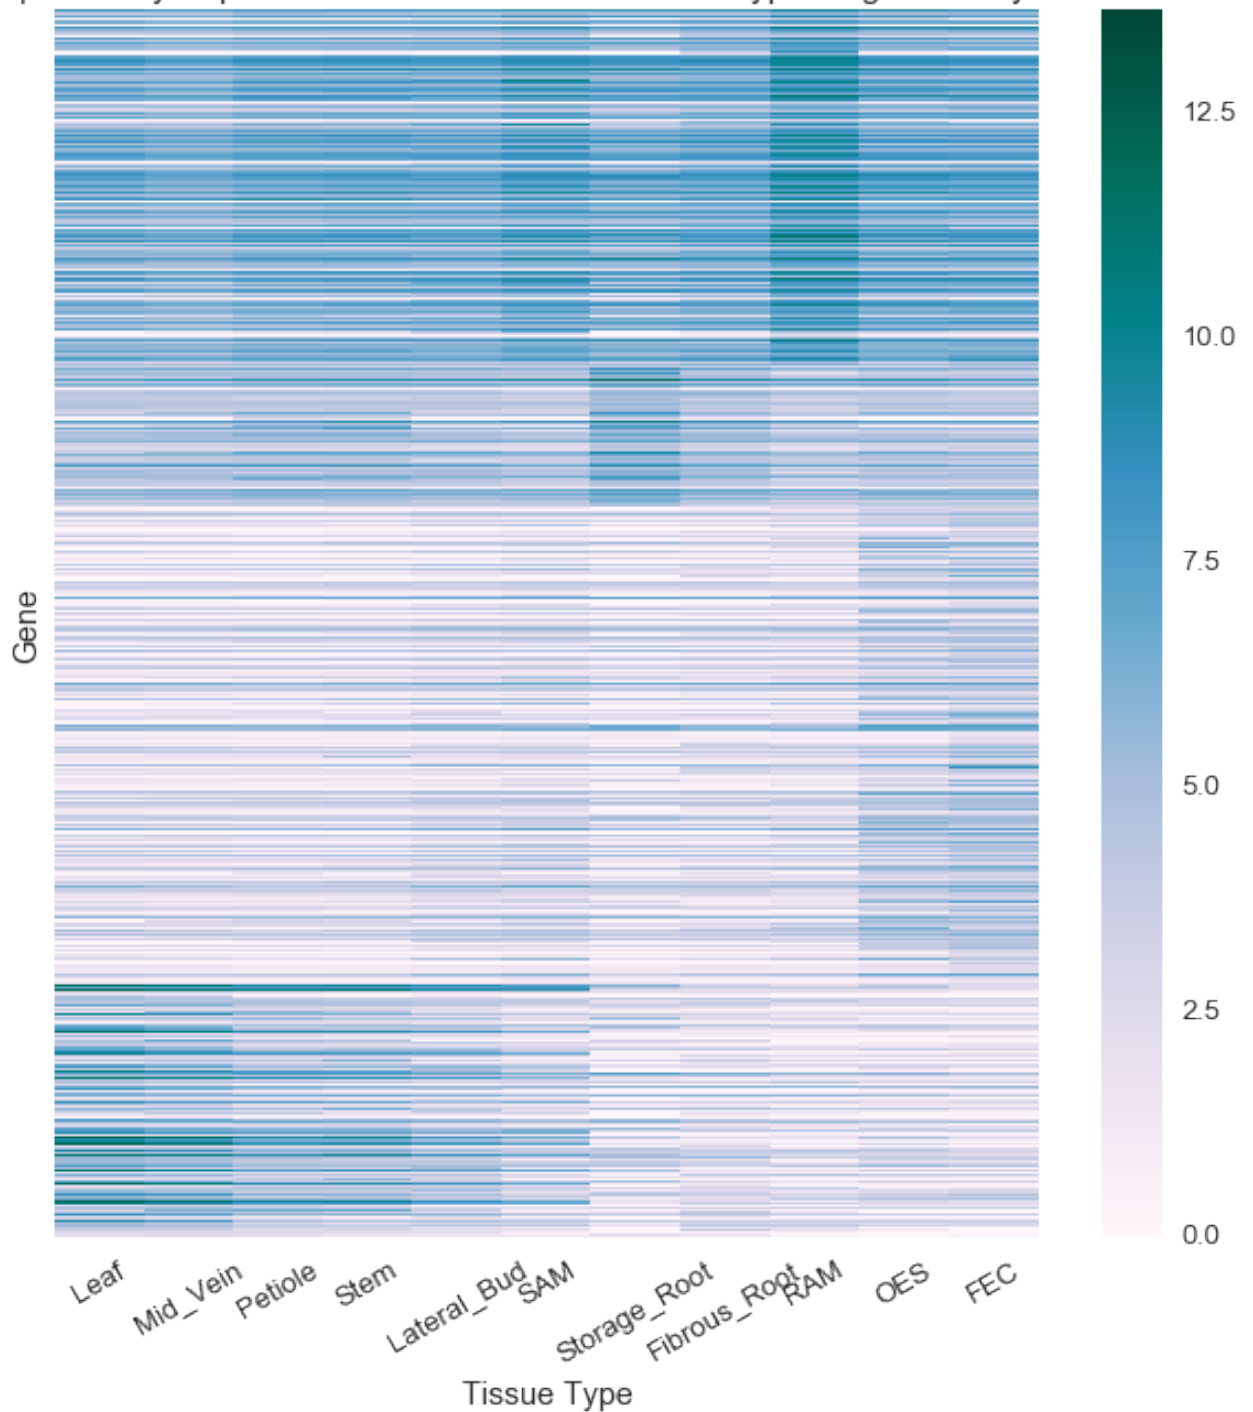

## 4 Plotting Distribution of FPKM

```
In [21]: # plot distribution of expression values in each tissue type
with( sns.plotting_context( 'talk' ) ):
    plt.figure(figsize=(15,10))
    sns.set_style('darkgrid')

    g = sns.boxplot(data=df_cuff_ann[df_cuff_ann.iloc[:, :11] > 1].iloc[:, :11])
    g.set_yscale('log', basey=2)
    g.set_ylabel('Expression Level')
    g.set_xlabel('Tissue Type')
    g.set_title('Expression Levels of Annotated Genes \
in Cassava in 11 Different Tissue Types (FPKM > 1)')
    g.set_xticklabels(df_cuff_ann.iloc[:, :11].columns, rotation=30)

    plt.savefig('./mesculenta_v6_output/genes_exp_dist_1FPKM.pdf',
                bbox_inches='tight')
```

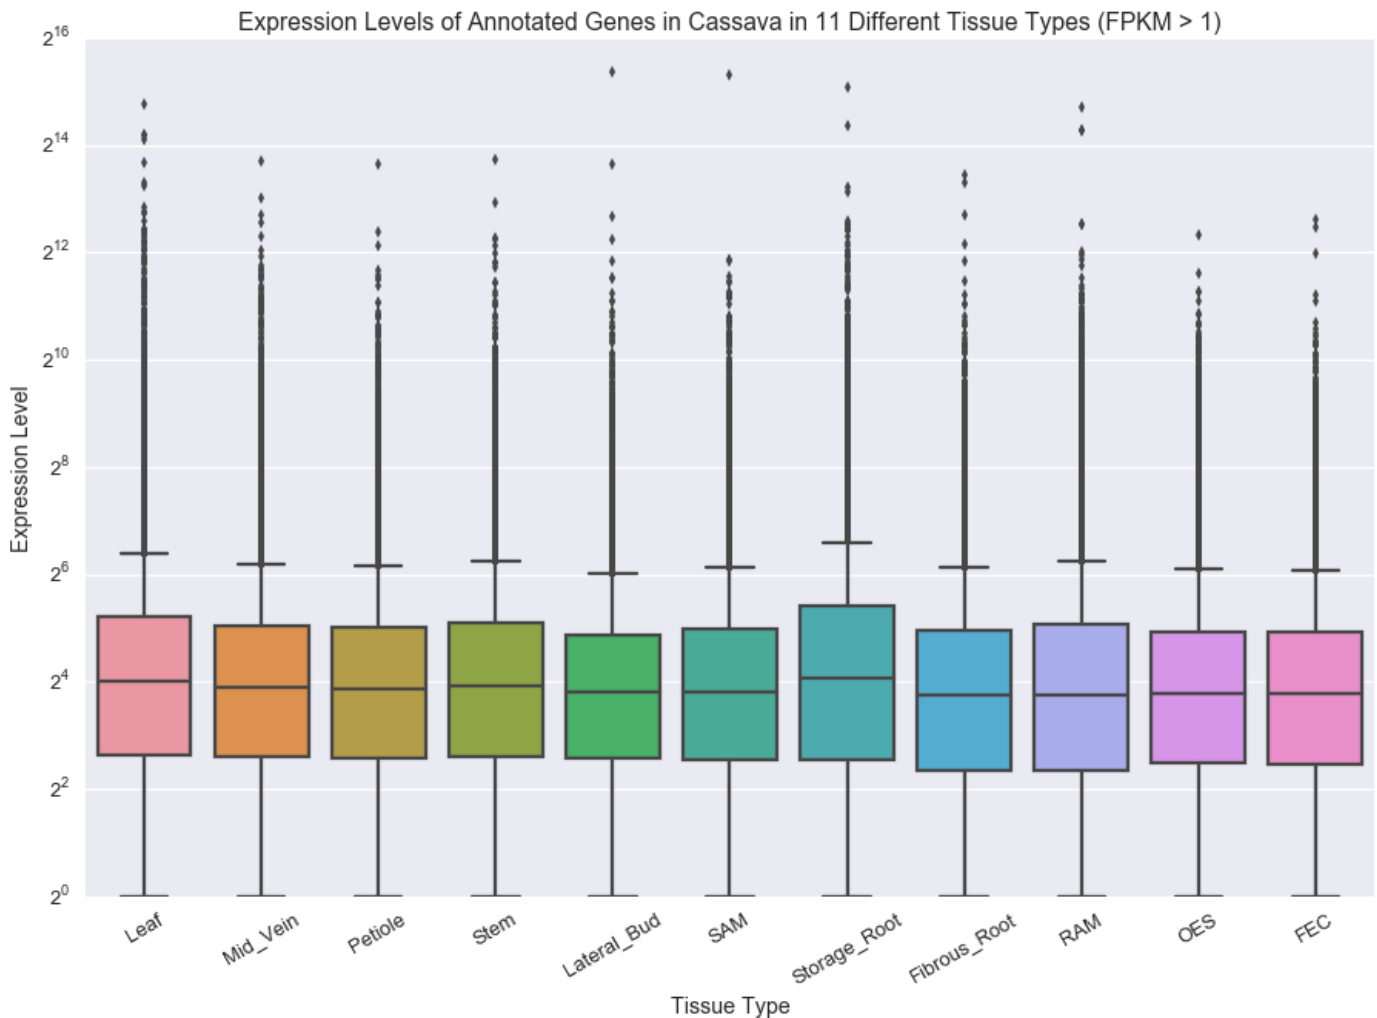

### 4.1 Gene Expression Density Plot

```
In [22]: with( sns.plotting_context( 'talk' ) ):
    sns.set_style('darkgrid')
```

```

# plot distribution of each tissue type separately
g = sns.kdeplot(df_cuff_ann['Leaf'],clip=(0,3000), color="#33a02c",
               cumulative=True, gridsize=6000)
plt.plot((2000, df_cuff_ann['Leaf'].max()), (1,1), color="#33a02c")

sns.kdeplot(df_cuff_ann['Mid_Vein'],clip=(0,3000), color="#b2df8a",
            cumulative=True, gridsize=6000)
plt.plot((2000, df_cuff_ann['Mid_Vein'].max()), (1,1), color="#b2df8a")

sns.kdeplot(df_cuff_ann['Petiole'],clip=(0,3000), color="#1f78b4",
            cumulative=True, gridsize=6000)
plt.plot((2000, df_cuff_ann['Petiole'].max()), (1,1), color="#1f78b4")

sns.kdeplot(df_cuff_ann['Stem'],clip=(0,3000), color="#a6cee3",
            cumulative=True, gridsize=6000)
plt.plot((2000, df_cuff_ann['Stem'].max()), (1,1), color="#a6cee3")

sns.kdeplot(df_cuff_ann['Lateral_Bud'],clip=(0,3000), color="#6a3d9a",
            cumulative=True, gridsize=6000)
plt.plot((2000, df_cuff_ann['Lateral_Bud'].max()), (1,1), color="#6a3d9a")

sns.kdeplot(df_cuff_ann['SAM'],clip=(0,3000), color="#cab2d6",
            cumulative=True, gridsize=6000)
plt.plot((2000, df_cuff_ann['SAM'].max()), (1,1), color="#cab2d6")

sns.kdeplot(df_cuff_ann['Storage_Root'],clip=(0,3000), color="#ffff99",
            cumulative=True, gridsize=6000)
plt.plot((2000, df_cuff_ann['Storage_Root'].max()), (1,1), color="#ffff99")

sns.kdeplot(df_cuff_ann['Fibrous_Root'],clip=(0,3000), color="#ff7f00",
            cumulative=True, gridsize=6000)
plt.plot((2000, df_cuff_ann['Fibrous_Root'].max()), (1,1), color="#ff7f00")

sns.kdeplot(df_cuff_ann['RAM'],clip=(0,3000), color="#fdbf6f",
            cumulative=True, gridsize=6000)
plt.plot((2000, df_cuff_ann['RAM'].max()), (1,1), color="#fdbf6f")

sns.kdeplot(df_cuff_ann['OES'],clip=(0,3000), color="#e31a1c",
            cumulative=True, gridsize=6000)
plt.plot((2000, df_cuff_ann['OES'].max()), (1,1), color="#e31a1c")

sns.kdeplot(df_cuff_ann['FEC'],clip=(0,3000), color="#fb9a99",
            cumulative=True, gridsize=6000)
plt.plot((2000, df_cuff_ann['FEC'].max()), (1,1), color="#fb9a99")

g.axes.set_xlim(1,max(df_cuff_ann.max(numeric_only=True)))

# plot lines at FPKM cutoff values used in analysis
fpkm_high = 300
fpkm_on = 10
fpkm_on_loose = 8
fpkm_off = 1

```

```

fpkm_off_loose = 4

plt.plot((fpkm_high, fpkm_high), (0, 1))
plt.plot((fpkm_on, fpkm_on), (0, 1))
plt.plot((fpkm_on_loose, fpkm_on_loose), (0, 1))
plt.plot((fpkm_off, fpkm_off), (0, 1))
plt.plot((fpkm_off_loose, fpkm_off_loose), (0, 1))

g.set_xscale('log', base=2)
g.set_ylabel('Cumulative Distribution')
g.set_xlabel('Expression Value (FPKM)')
g.set_title('Cumulative Distribution of Annotated Gene \
Expression in 11 Tissue Types of Cassava (Log2 Scale)')

plt.legend(loc=4)

plt.savefig('./mesculenta_v6_output/CDF_gene_exp_logscale.pdf',
            bbox_inches='tight')

```

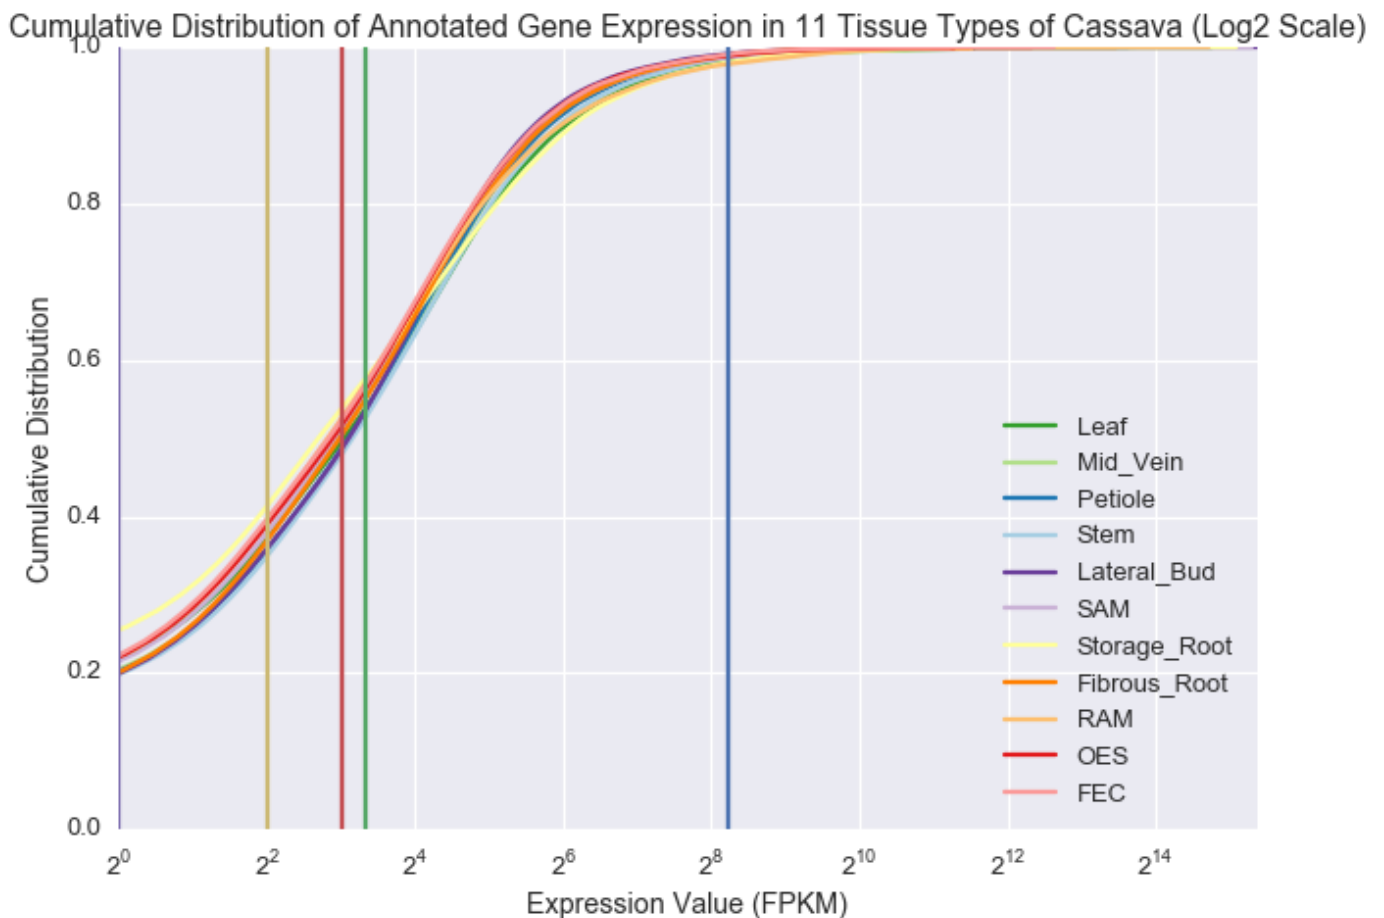

## 4.2 Percentiles of Expression Values in Tissue Types

```

In [23]: # Create dictionary of percentiles of various expression values
perc = {i: [percentileofscore( df_cuff_ann.loc[:, [i]].values, 1, kind='weak'),
           percentileofscore( df_cuff_ann.loc[:, [i]].values, 4, kind='weak' )],

```

```

percentileofscore( df_cuff_ann.loc[:,[i]].values, 8, kind='weak' ),
percentileofscore( df_cuff_ann.loc[:,[i]].values, 10, kind='weak' ),
percentileofscore( df_cuff_ann.loc[:,[i]].values, 50, kind='weak' ),
percentileofscore( df_cuff_ann.loc[:,[i]].values, 100, kind='weak' ),
percentileofscore( df_cuff_ann.loc[:,[i]].values, 200, kind='weak' ),
percentileofscore( df_cuff_ann.loc[:,[i]].values, 300, kind='weak' ),
percentileofscore( df_cuff_ann.loc[:,[i]].values, 400, kind='weak' ),
percentileofscore( df_cuff_ann.loc[:,[i]].values, 500, kind='weak' )]
    for i in df_cuff_ann.columns[:11] }
perc_df = pd.DataFrame(perc, index=[1,4,8,10,50,100,200,300,400,500])
perc_df

```

```

Out [23]:
          FEC  Fibrous_Root  Lateral_Bud      Leaf  Mid_Vein      OES  \
1    28.358090    24.136832    24.873561  28.214727  25.502768  27.947911
4    41.806380    39.440882    37.879814  40.846641  38.528932  41.348413
8    52.658198    50.953765    48.807296  50.049779  48.644021  51.961292
10   57.078571    55.322369    53.864840  54.175461  53.076341  56.509100
50   90.088009    89.128270    90.402612  86.786667  88.738003  89.992434
100  95.834495    95.420334    96.133169  93.831389  95.257059  95.993788
200  98.295568    98.088487    98.498666  97.284059  98.255744  98.255744
300  99.092031    98.984509    99.143802  98.411055  98.936721  98.940703
400  99.498228    99.386723    99.474334  98.912827  99.243359  99.342917
500  99.645574    99.617697    99.657521  99.139819  99.422564  99.561945

          Petiole      RAM      SAM      Stem  Storage_Root
1    25.032854  27.466051  27.310740  24.606746    34.184222
4    38.126717  42.069213  40.169647  37.581140    46.238700
8    48.902871  53.092270  51.308192  48.480745    54.772809
10   53.773247  57.417068  55.832105  53.048465    58.078133
50   88.690215  87.634901  89.331369  87.467644    85.767194
100  95.093784  93.731831  95.404404  94.444666    93.285811
200  97.992911  96.849986  97.881407  97.590697    96.945562
300  98.940703  97.869460  98.701764  98.729640    98.116363
400  99.334953  98.371232  99.127872  99.195572    98.649994
500  99.522122  98.677870  99.346900  99.438493    98.952650

```

### 4.3 Highly Expressed Genes Across All Tissue Types

#### Cutoff of Same Value Determined by Housekeeping Genes (Specifically Max Expression of Manes.09G039900)

```

In [24]: # drop genes that have expression less than 300 in any tissue type
df_cuff_min = df_cuff_ann[df_cuff_ann.min(axis=1, numeric_only=True) > 300]

# set gene_id as index
df_cuff_min = df_cuff_min.set_index('gene_id')

print('Highly Expressed Genes: {}'.format(df_cuff_min.shape[0]))

```

Highly Expressed Genes: 31

```

In [25]: with( sns.plotting_context( 'talk' ) ):
plt.figure(figsize=(15,10))
sns.set_style('darkgrid')

```



```

g = sns.boxplot(data=df_cuff_min.iloc[:, :11])
g.set_yscale('log', basey=2)
g.set_ylabel('Expression Level')
g.set_xlabel('Tissue Type')
g.set_title('Expression Levels of Highly Expressed Annotated Genes \
in Cassava in 11 Different Tissue Types (tophat/cufflinks to v6.1)')
g.set_xticklabels(df_cuff_min.iloc[:, :11].columns, rotation=30)

plt.savefig('./mesculenta_v6_output/genes_high_exp_dist.pdf',
            bbox_inches='tight')

```

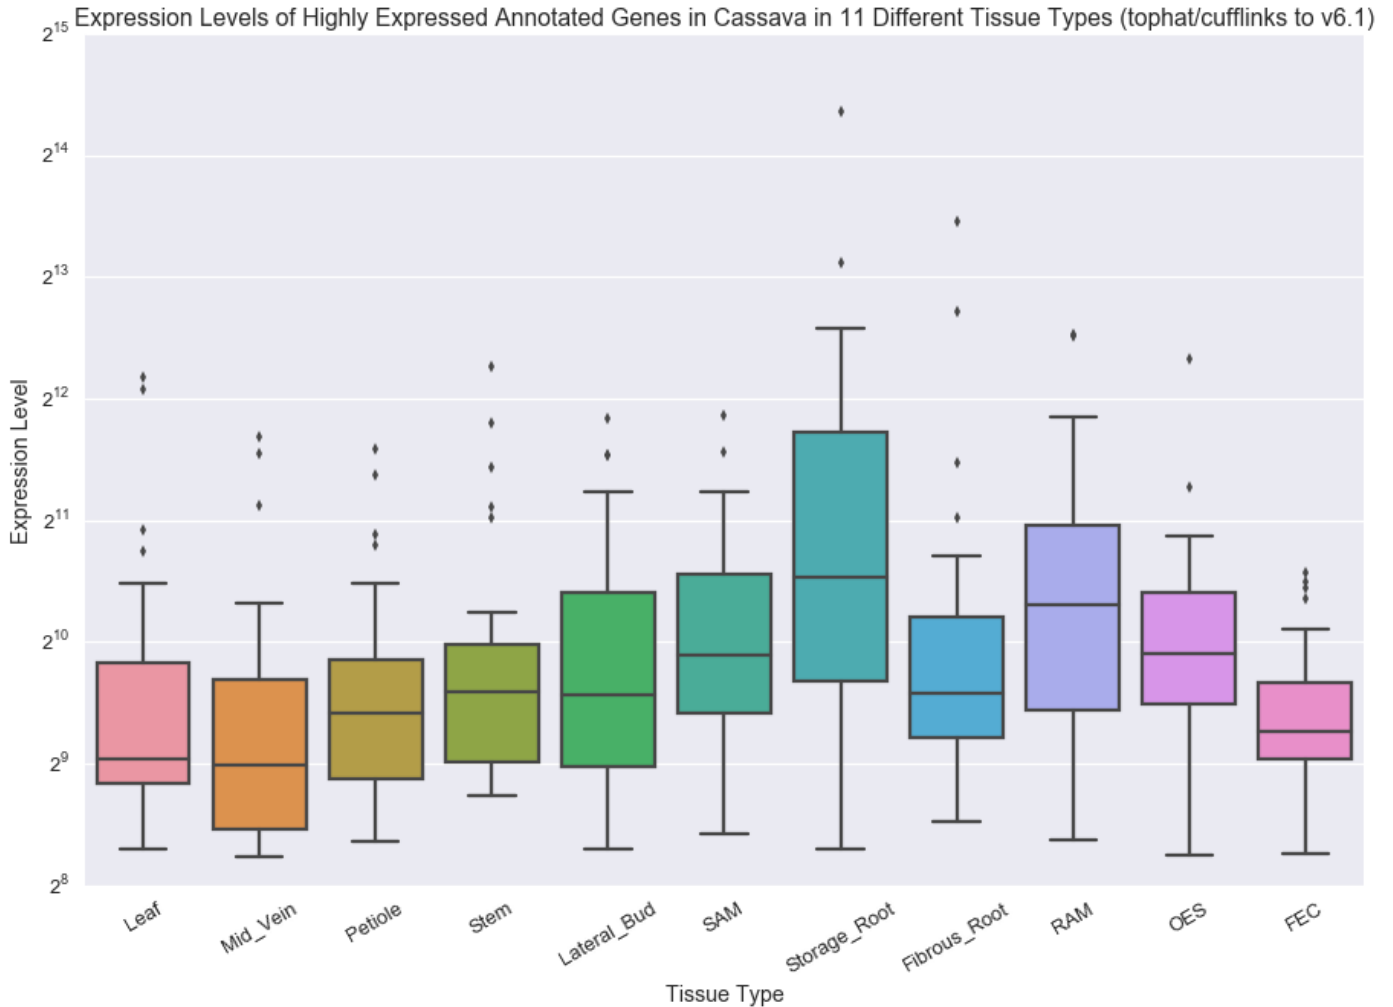

```

In [26]: df_plot = df_cuff_min.drop(['locus', 'annot'], axis=1).set_index(['gene'])

```

```

with( sns.plotting_context( 'talk' ) ):
    plt.figure(figsize=(15,15))
    sns.set_style('darkgrid')

    g = sns.heatmap(df_plot,
                    cmap='Blues',
                    annot=True,

```

```

        fmt='.0f',
        vmax=7000 # set max for heatmap color scale at
                  # 7000FPKM to capture more contrast
    )

g.set_ylabel('Gene')
g.set_xlabel('Tissue Type')
plt.savefig('./mesculenta_v6_output/genes_high_exp_annot_heatmap.pdf',
            bbox_inches='tight')

```

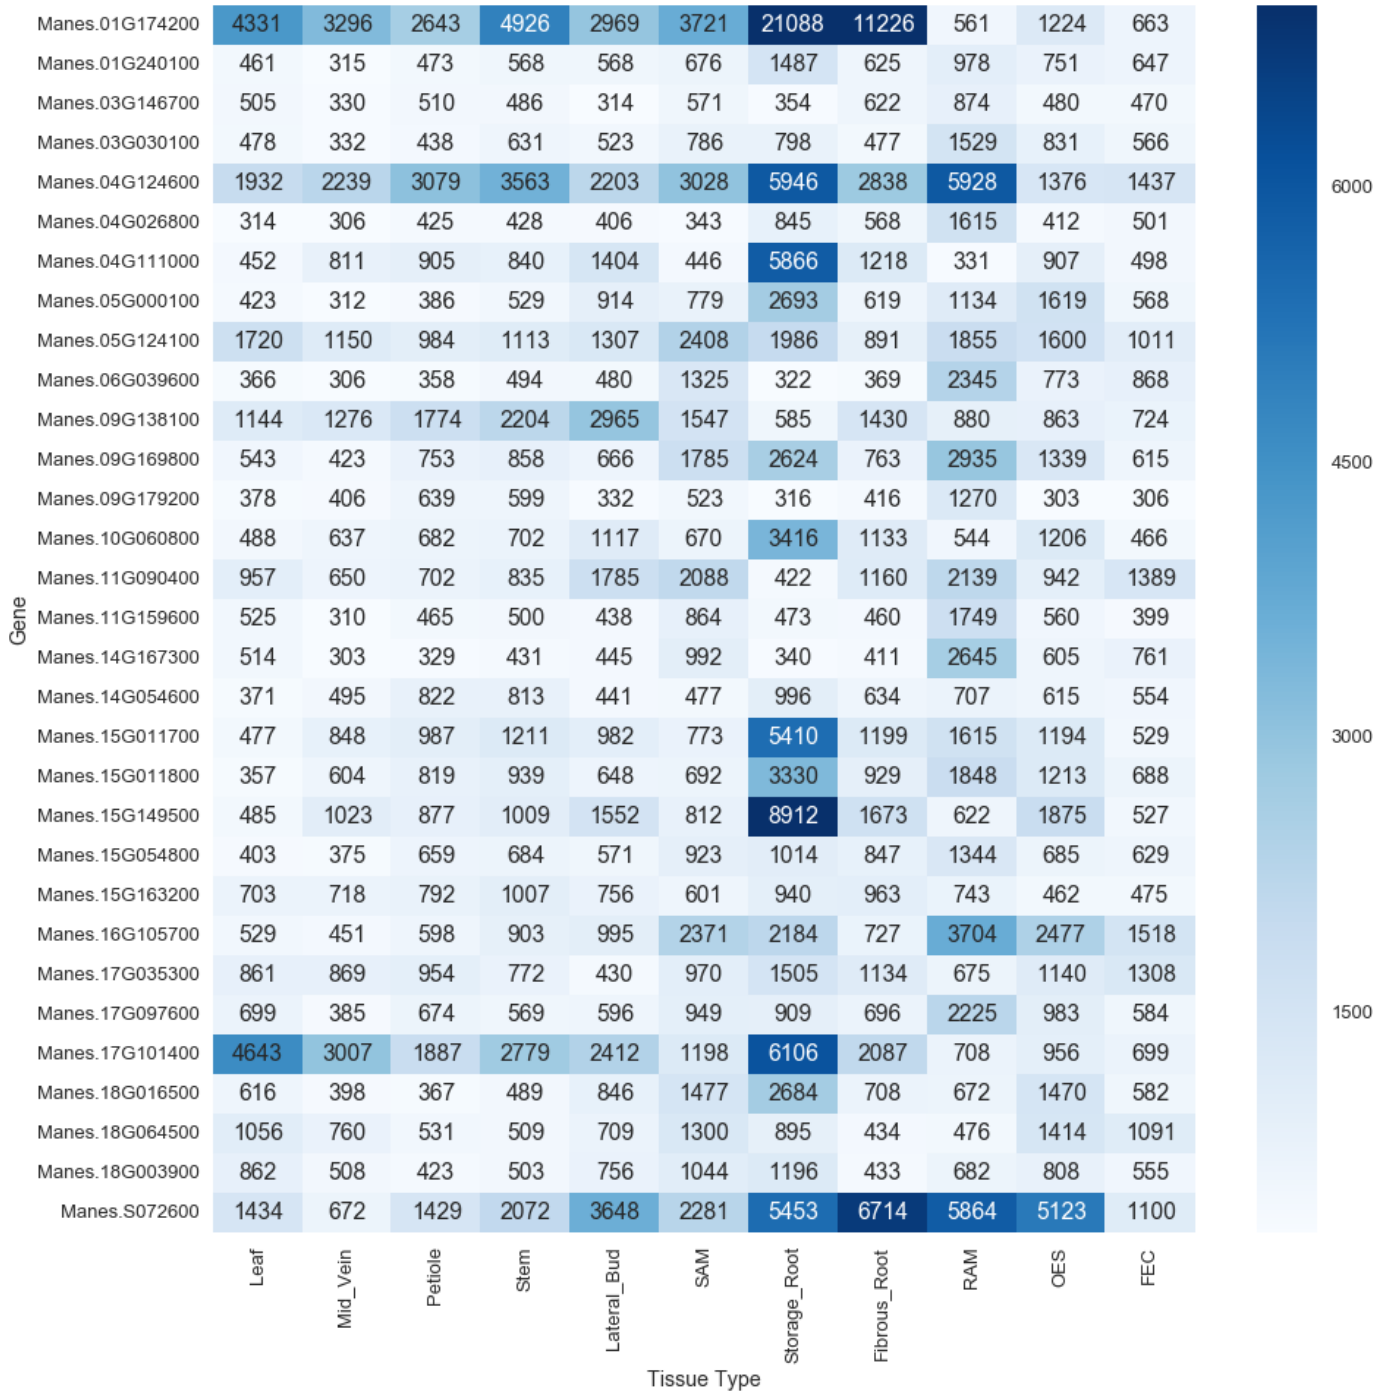

In [27]: # associate highly expressed genes with functional annotations

```

high_exp_genes = df_cuff_min['gene']
high_exp_genes = high_exp_genes.to_frame().merge(annot.loc[:, ['gene', 'annot']],
                                                how='left',
                                                on='gene'
                                                )

# sort by 'gene' and set 'gene' as index
high_exp_genes = high_exp_genes.sort_values('gene').set_index('gene')

# write to table
high_exp_genes.to_csv('./mesculenta_v6_output/high_exp_gene_annot_table.txt',
                      sep='\t')

high_exp_genes

```

```

Out[27]:

```

| gene            | annot                                             |
|-----------------|---------------------------------------------------|
| Manes.01G174200 | metallothionein 2B                                |
| Manes.01G240100 | 60S acidic ribosomal protein family               |
| Manes.03G030100 | Ribosomal protein S30 family protein              |
| Manes.03G146700 | GTP binding Elongation factor Tu family protein   |
| Manes.04G026800 | ascorbate peroxidase 1                            |
| Manes.04G111000 | polyubiquitin 10                                  |
| Manes.04G124600 | Translation machinery associated TMA7             |
| Manes.05G000100 | Ribosomal protein L19e family protein             |
| Manes.05G124100 | high mobility group B2                            |
| Manes.06G039600 | Ribosomal protein L39 family protein              |
| Manes.09G138100 | dehydrin family protein                           |
| Manes.09G169800 | Ribosomal protein S21e                            |
| Manes.09G179200 | ADP-ribosylation factor A1E                       |
| Manes.10G060800 | DNAJ homologue 2                                  |
| Manes.11G090400 | rotamase CYP 1                                    |
| Manes.11G159600 | 60S acidic ribosomal protein family               |
| Manes.14G054600 | glyceraldehyde-3-phosphate dehydrogenase C sub... |
| Manes.14G167300 | Zinc-binding ribosomal protein family protein     |
| Manes.15G011700 | translationally controlled tumor protein          |
| Manes.15G011800 | translationally controlled tumor protein          |
| Manes.15G054800 | GTP binding Elongation factor Tu family protein   |
| Manes.15G149500 | ADP-ribosylation factor A1F                       |
| Manes.15G163200 | cold, circadian rhythm, and rna binding 2         |
| Manes.16G105700 | Ribosomal protein S30 family protein              |
| Manes.17G035300 | ubiquitin 4                                       |
| Manes.17G097600 | translocase of the outer mitochondrial membrane 6 |
| Manes.17G101400 | cold, circadian rhythm, and RNA binding 1         |
| Manes.18G003900 | high mobility group B2                            |
| Manes.18G016500 | Histone superfamily protein                       |
| Manes.18G064500 | Histone superfamily protein                       |
| Manes.S072600   | Zinc-binding ribosomal protein family protein     |

## 4.4 Specific Tissue Expression

### Single Tissue Expression for Promoters

## tissue specific on10 off1

```
In [28]: on_thresh = 10
         off_thresh = 1

df_tiss_spec = pd.DataFrame( columns = df_cuff_ann.columns )

# loop through each tissue
for t in tissue_order:
    t = [t]

    # create index lists of on tissues and off tissues
    index_on = sorted([ i for j in tissue_order
                        if j in t for i in tissue_rep_index[j] ])
    index_off = sorted([ i for j in tissue_order
                        if j not in t for i in tissue_rep_index[j] ])

    # subset the replicate dataset for genes matching the tissue
    # parameters for this iteration of the loop
    df_temp = genes_rgt_piv[(genes_rgt_piv.iloc[:,index_off]
                            < off_thresh).all(axis=1) &
                            (genes_rgt_piv.iloc[:,index_on]
                            > on_thresh).all(axis=1)
                            ]

    # select for genes with annotations
    df_temp = df_temp[df_temp['gene_id'].isin(df_cuff_ann['gene_id'])]

    # add annotations and use mean expression values for each tissue
    # instead of replicate data
    df_temp = df_temp['gene_id'].to_frame().merge(df_cuff_ann_all, on='gene_id')

    # sort by max value of each gene
    df_max = df_temp.iloc[:, :11].max(axis=1)
    df_temp = df_temp.reindex( df_max.sort_values(ascending=False).index )

    # keep only the top 3 genes in each tissue
    df_tiss_spec = pd.concat([df_tiss_spec,
                              df_temp.iloc[:3, :]
                              ]
                              )

df_tiss = df_tiss_spec.copy().set_index('gene')

print( 'Gene Count: {}'.format(df_tiss.shape[0]) )
```

Gene Count: 11

## tissue specific on10 off1: Grouped Tissues

```
In [29]: on_thresh = 10
         off_thresh = 1
```

```

df_tiss_spec = pd.DataFrame( columns = df_cuff_ann.columns )

tissue_groups = [['Leaf', 'Mid_Vein', 'Petiole', 'Stem', 'Lateral_Bud', 'SAM'],
                 ['Storage_Root'], ['Fibrous_Root', 'RAM'],
                 ['OES', 'FEC']]
                ]

# loop through each tissue
for t in tissue_groups:
    # create index lists of on tissues and off tissues
    index_on = sorted([ i for j in tissue_order
                       if j in t for i in tissue_rep_index[j] ])
    index_off = list( set(range(32)) - set(index_on) )

    # subset the replicate dataset for genes matching the tissue
    # parameters for this iteration of the loop
    df_temp = genes_rgt_piv[(genes_rgt_piv.iloc[:,index_off]
                             < off_thresh).all(axis=1) &
                             (genes_rgt_piv.iloc[:,index_on]
                              > on_thresh).all(axis=1)
                             ]

    # select for genes with annotations
    df_temp = df_temp[df_temp['gene_id'].isin(df_cuff_ann['gene_id'])]

    # add annotations and use mean expression values for each tissue
    # instead of replicate data
    df_temp = df_temp['gene_id'].to_frame().merge(df_cuff_ann, on='gene_id')

    # sort by max value of each gene
    df_max = df_temp.iloc[:, :11].max(axis=1)
    df_temp = df_temp.reindex( df_max.sort_values(ascending=False).index )

    # keep only the top 3 genes in each tissue
    df_tiss_spec = pd.concat([df_tiss_spec,
                              df_temp.iloc[:3, :]
                              ]
                              )

df_tissgrps = df_tiss_spec.copy().set_index('gene')

print( 'Gene Count: {}'.format(df_tissgrps.shape[0]) )

```

Gene Count: 9

#### tissue specific on8 off4

```

In [30]: on_thresh = 8
         off_thresh = 4

df_tiss_spec = pd.DataFrame( columns = df_cuff_ann.columns )

# loop through each tissue

```

```

for t in tissue_order:
    # using relaxed parameters, finding single tissue genes in
    # each tissue without 3 genes with strict parameters
    if t == 'FEC' or t == 'Fibrous_Root' or t == 'RAM':
        continue

t = [t]

# create index lists of on tissues and off tissues
index_on = sorted([ i for j in tissue_order
                    if j in t for i in tissue_rep_index[j] ])
index_off = sorted([ i for j in tissue_order
                    if j not in t for i in tissue_rep_index[j] ])

# subset the replicate dataset for genes matching the tissue
# parameters for this iteration of the loop
df_temp = genes_rgt_piv[(genes_rgt_piv.iloc[:,index_off]
                        < off_thresh).all(axis=1) &
                        (genes_rgt_piv.iloc[:,index_on]
                        > on_thresh).all(axis=1)
                        ]

# select for genes with annotations
df_temp = df_temp[df_temp['gene_id'].isin(df_cuff_ann['gene_id'])]

# add annotations and use mean expression values for each tissue
# instead of replicate data
df_temp = df_temp['gene_id'].to_frame().merge(df_cuff_ann, on='gene_id')
df_temp = df_temp.drop_duplicates('gene')

# sort by max value of each gene
df_max = df_temp.iloc[:, :11].max(axis=1)
df_temp = df_temp.reindex( df_max.sort_values(ascending=False).index )

# keep only the top 3 genes in each tissue
df_tiss_spec = pd.concat([df_tiss_spec,
                          df_temp.iloc[:3, :]
                          ]
                          )

df_tissrlx = df_tiss_spec.copy().set_index('gene')

print( 'Gene Count: {}'.format(df_tissrlx.shape[0]) )

```

Gene Count: 17

## Tissue Specific Plot Prep

```

In [31]: # drop first gene in SAM so it's not duplicated in the plot
df_tissrlx.drop( df_tissrlx[df_tissrlx['SAM'] > on_thresh].index[1:],
                inplace=True)

# concatenate the 3 Tissue Specific DataFrames for the plot

```

```

df_plot = pd.concat( [df_tiss, df_tissrlx, df_tissgrps] )
df_plot['annot'].to_csv('./mesculenta_v6_output/specific_exp_gene_annotonly.txt')

# Restrict plot DataFrame to expression values
df_plot = df_plot.iloc[:, :11]

# Sort Columns in tissue_order as specified earlier
df_plot = df_plot.loc[:, tissue_order]
df_tiss_spec = df_tiss_spec.set_index('gene_id')

print( 'Gene Count: {}'.format(df_plot.shape[0]) )

```

Gene Count: 35

```

In [32]: df_plot_log = df_plot.copy()
df_plot_log = np.log2(df_plot_log + 1)

with( sns.plotting_context( 'talk' ) ):
    plt.figure(figsize=(15,15))
    sns.set_style('darkgrid')

    g = sns.heatmap(df_plot_log, cmap='PuBuGn', annot=True, fmt='.1f')

    g.set_ylabel('Gene')
    g.set_xlabel('Tissue Type')
    g.set_title('Genes Specifically Expressed in \
Eleven Tissue Types (log2 Values)')
    g.set_xticklabels(df_plot_log.columns, rotation=30)

    plt.savefig('./mesculenta_v6_output/specific_exp_mrg_strict_relaxed_log.pdf',
                bbox_inches='tight')

```

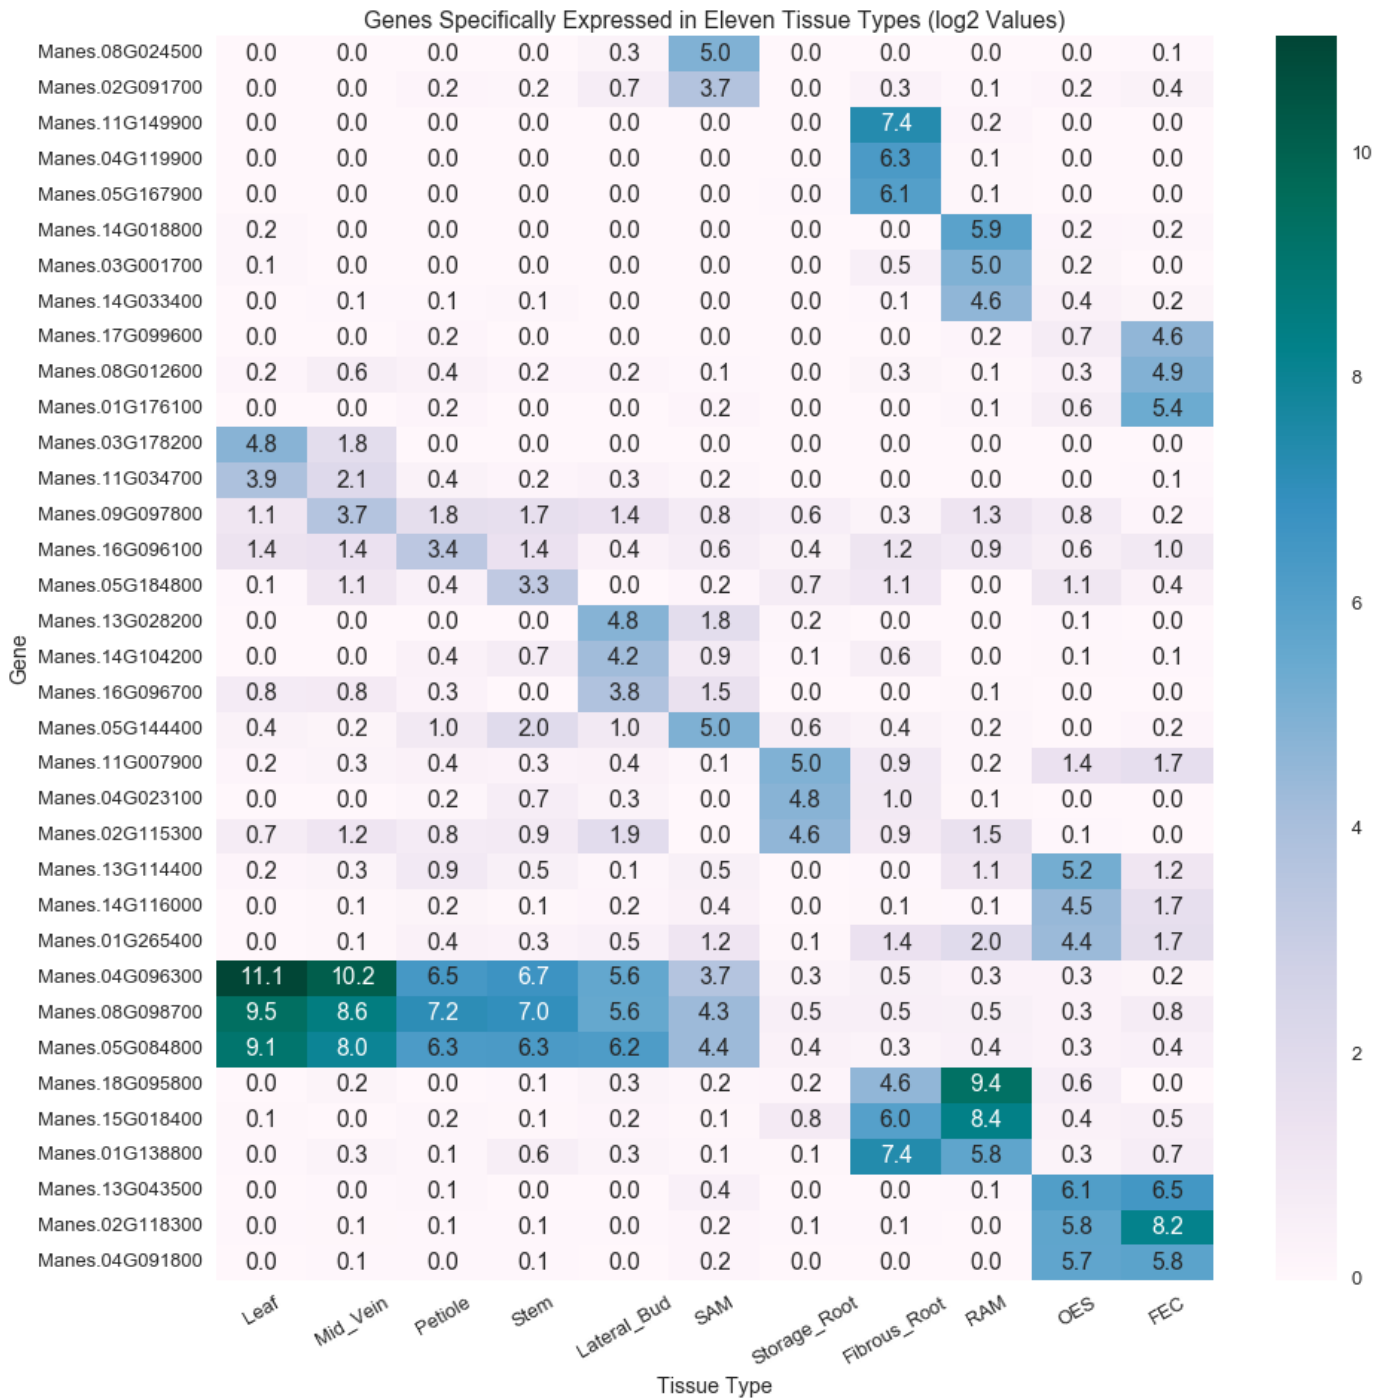

## 5 Pairwise Tissue Comparison

### 5.1 OES and FEC

#### 5.1.1 Differentially Expressed in OES and FEC

```
In [33]: lfc = 2
         sig = 0.05
         fpkm_cutoff = 1
```



```

# limit list of genes to significantly differentially
#     expressed with a abs(log2(fold_change)) value > 2
#     and an expression value of at least 1 FPKM in one of the tissues
df_volc = df_cuff[(df_cuff['sample_1'] == 'FEC')
                  & (df_cuff['sample_2'] == 'OES')
                  & (df_cuff['q_value'] < sig )
                  & (np.abs(df_cuff['log2(fold_change)']) > lfc)
                  & ((df_cuff['value_1'] > fpkm_cutoff)
                     | (df_cuff['value_2'] > fpkm_cutoff))
                  & (df_cuff['gene'] != '-')].merge( annot[['gene', 'annot']],
                                                    how='inner',
                                                    on='gene',
                                                    copy=False)

df_volc_n = df_cuff[(df_cuff['sample_1'] == 'FEC')
                   & (df_cuff['sample_2'] == 'OES')
                   & ((df_cuff['q_value'] >= sig )
                      | (np.abs(df_cuff['log2(fold_change)']) <= lfc ))
                   & ((df_cuff['value_1'] > fpkm_cutoff)
                      | (df_cuff['value_2'] > fpkm_cutoff))
                   & (df_cuff['gene'] != '-')].merge( annot[['gene', 'annot']],
                                                    how='inner',
                                                    on='gene',
                                                    copy=False)

# write genes to file
df_volc.to_csv('./mesculenta_v6_output/diffexp_oesfec.txt', sep='\t')

# calculate log score for volcano plot
df_volc['-log(q_value)'] = -np.log10(df_volc['q_value'])
df_volc_n['-log(q_value)'] = -np.log10(df_volc_n['q_value'])

print('OES vs FEC')
print('Differentially Expressed Genes: {}'.format(df_volc.shape[0]))

# Reflect foldchange values to convey the transition
# from OES to FEC
df_volc['log2(fold_change)'] *=-1
df_volc_n['log2(fold_change)'] *=-1

```

OES vs FEC  
Differentially Expressed Genes: 2022

```

In [34]: #####
        ## GO PREP
        #####
df_volc[ df_volc['log2(fold_change)'] < -2
         ][['gene']].drop_duplicates().to_csv(
         './mesculenta_v6_output/goprep_diffexp_oesfec_oes.txt', index=False)

df_volc[ df_volc['log2(fold_change)'] > 2
         ][['gene']].drop_duplicates().to_csv(
         './mesculenta_v6_output/goprep_diffexp_oesfec_fec.txt', index=False)

```

```
df_cuff[(df_cuff['sample_1'] == 'FEC') &
        (df_cuff['sample_2'] == 'OES') &
        ((df_cuff['value_1'] > 1) | (df_cuff['value_2'] > 1)) &
        (df_cuff['gene'] != '-')]
    [['gene']].drop_duplicates().to_csv(
        './mesculenta_v6_output/goprep_bkgrnd_oesfec.txt', index=False)
```

```
In [35]: #####
## goatools ANALYSIS:
# python ~/src/goatools/scripts/find_enrichment.py \
#     --fdr --obo ~/src/goatools/go-basic.obo \
#     goprep_diffexp_oesfec_oes.txt goprep_bkgrnd_oesfec.txt \
#     Mesculenta_305_v6.1.annotation_info.go_only_uniq.txt \
#     > oesfec_oes_goatools.txt

## Process goatools output
### OES
print( 'OES' )
df_oesfecgo_oes = pd.read_table(
    './mesculenta_v6_output/oesfec_oes_goatools.txt', comment='#')

print( 'GO count unfiltered: {}'.format(df_oesfecgo_oes.shape[0]))
print( 'Enriched GO count, FDR < 0.01: {}'.format(
    df_oesfecgo_oes[(df_oesfecgo_oes['p_fdr'] < 0.01) &
                    (df_oesfecgo_oes['enrichment'] == 'e')]
                    ).shape[0] )
)
print( 'Enriched GO count, FDR < 0.001: {}'.format(
    df_oesfecgo_oes[(df_oesfecgo_oes['p_fdr'] < 0.001) &
                    (df_oesfecgo_oes['enrichment'] == 'e')]
                    ).shape[0] )
)

print()

#####
## goatools ANALYSIS:
# python ~/src/goatools/scripts/find_enrichment.py \
#     --fdr --obo ~/src/goatools/go-basic.obo \
#     goprep_diffexp_oesfec_fec.txt goprep_bkgrnd_oesfec.txt \
#     Mesculenta_305_v6.1.annotation_info.go_only_uniq.txt \
#     > oesfec_fec_goatools.txt

### FEC
print( 'FEC' )
df_oesfecgo_fec = pd.read_table(
    './mesculenta_v6_output/oesfec_fec_goatools.txt', comment='#')

print( 'GO count unfiltered: {}'.format(df_oesfecgo_fec.shape[0]))
print( 'Enriched GO count, FDR < 0.01: {}'.format(
    df_oesfecgo_fec[(df_oesfecgo_fec['p_fdr'] < 0.01) &
                    (df_oesfecgo_fec['enrichment'] == 'e')]
                    ).shape[0] )
)
```

```

        ].shape[0] )
    )
    print( 'Enriched GO count, FDR < 0.001: {}'.format(
        df_oesfecgo_fec[(df_oesfecgo_fec['p_fdr'] < 0.001) &
            (df_oesfecgo_fec['enrichment'] == 'e')]
            ].shape[0] )
    )

```

OES

```

GO count unfiltered: 236
Enriched GO count, FDR < 0.01: 43
Enriched GO count, FDR < 0.001: 35

```

FEC

```

GO count unfiltered: 275
Enriched GO count, FDR < 0.01: 26
Enriched GO count, FDR < 0.001: 16

```

```

In [36]: print('Genes Upregulated in FEC: {}'.format(
        df_volc[df_volc['log2(fold_change)'] > 2].shape[0])
    )
    print('Genes Upregulated in OES: {}'.format(
        df_volc[df_volc['log2(fold_change)'] < -2].shape[0])
    )

```

```

Genes Upregulated in FEC: 937
Genes Upregulated in OES: 1085

```

```

In [37]: lfc = 2
        on_thresh = 10
        off_thresh = 1

        with( sns.plotting_context('talk') ):
            plt.figure(figsize=(15,12))
            sns.set_style('darkgrid')

            g = sns.regplot( y='-log(q_value)',
                x='log2(fold_change)',
                data=df_volc_n,
                scatter=True,
                fit_reg=False
            )

            g = sns.regplot( y='-log(q_value)',
                x='log2(fold_change)',
                data=df_volc,
                scatter=True,
                fit_reg=False
            )

            y_limit = (0,4)

```

```

x_limit = (-30,30)
g.axes.set_ylim(*y_limit)
g.axes.set_xlim(*x_limit)
g.set_title( 'Volcano Plot of Genes Differentially \
Expressed from OES to FEC')

plt.plot( (lfc,lfc), (0,y_limit[1]), color='red', alpha = 0.4 )
plt.plot( (-lfc,-lfc), (0,y_limit[1]), color='red', alpha = 0.4 )
plt.plot( (x_limit[0], x_limit[1]), (1.3,1.3),
         linestyle = '--', color='red', alpha = 0.4 )

plt.savefig('./mesculenta_v6_output/volcano_diffexp_oesfec.pdf',
           bbox_inches='tight')

```

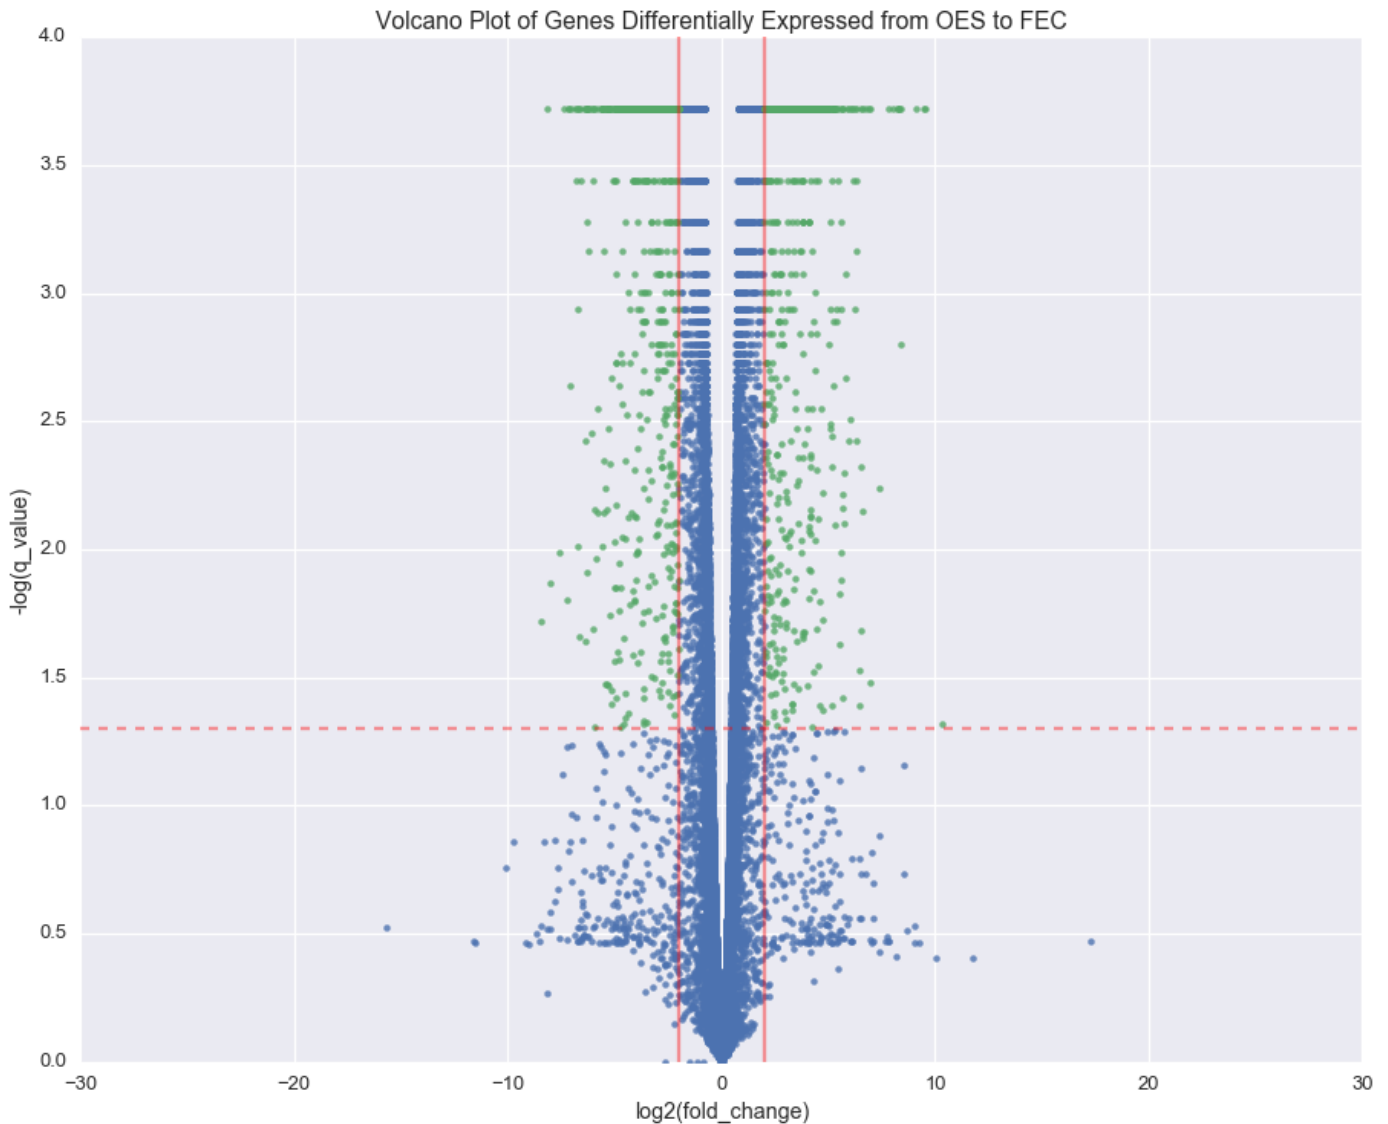

## 5.2 Storage Root and Fibrous Root

### 5.2.1 Differentially Expressed in Storage\_Root and Fibrous\_Root

```
In [38]: #####
        ## ROOTS #####
        #####

lfc = 2
sig = 0.05
fpkm_cutoff = 1

# limit list of genes to significantly differentially
#     expressed with a abs(log2(fold_change)) value > 2
#     and an expression value of at least 1 FPKM in one of the tissues
df_volc = df_cuff[(df_cuff['sample_1'] == 'Storage_Root')
                  & (df_cuff['sample_2'] == 'Fibrous_Root')
                  & (df_cuff['q_value'] < sig )
                  & (np.abs(df_cuff['log2(fold_change)']) > lfc)
                  & ((df_cuff['value_1'] > fpkm_cutoff)
                     | (df_cuff['value_2'] > fpkm_cutoff))
                  & (df_cuff['gene'] != '-')].merge( annot[['gene', 'annot']],
                                                    how='inner',
                                                    on='gene',
                                                    copy=False)

df_volc_n = df_cuff[(df_cuff['sample_1'] == 'Storage_Root')
                   & (df_cuff['sample_2'] == 'Fibrous_Root')
                   & ((df_cuff['q_value'] >= sig )
                      | (np.abs(df_cuff['log2(fold_change)']) <= lfc ))
                   & ((df_cuff['value_1'] > fpkm_cutoff)
                      | (df_cuff['value_2'] > fpkm_cutoff))
                   & (df_cuff['gene'] != '-')].merge( annot[['gene', 'annot']],
                                                    how='inner',
                                                    on='gene',
                                                    copy=False)

# write genes to file
df_volc.to_csv('./mesculenta_v6_output/diffexp_roots.txt', sep='\t')

# calculate log score for volcano plot
df_volc['-log(q_value)'] = -np.log10(df_volc['q_value'])
df_volc_n['-log(q_value)'] = -np.log10(df_volc_n['q_value'])

print('Storage Root vs Fibrous Root')
print('Differentially Expressed Genes: {}'.format(df_volc.shape[0]) )
```

```
Storage Root vs Fibrous Root
Differentially Expressed Genes: 3486
```

```
In [39]: #####
        ## GO PREP
        #####
```

```

df_volc[ df_volc['log2(fold_change)'] > 2
         ]['gene'].drop_duplicates().to_csv(
         './mesculenta_v6_output/goprep_diffexp_root_fib.txt', index=False)

df_volc[ df_volc['log2(fold_change)'] < -2
         ]['gene'].drop_duplicates().to_csv(
         './mesculenta_v6_output/goprep_diffexp_root_sto.txt', index=False)

df_cuff[(df_cuff['sample_1'] == 'Storage_Root') &
        (df_cuff['sample_2'] == 'Fibrous_Root') &
        ((df_cuff['value_1'] > 1) | (df_cuff['value_2'] > 1)) &
        (df_cuff['gene'] != '-')]
         ]['gene'].drop_duplicates().to_csv(
         './mesculenta_v6_output/goprep_bkgrnd_root.txt', index=False)

```

```

In [40]: ## goatools ANALYSIS:
# python ~/src/goatools/scripts/find_enrichment.py \
# --fdr --obo ~/src/goatools/go-basic.obo \
# goprep_diffexp_root_fib.txt goprep_bkgrnd_root.txt \
# Mesculenta_305_v6.1.annotation_info.go_only_uniq.txt \
# > root_fib_goatools.txt

## Process goatools output
### FIBROUS ROOT
print('FIBROUS ROOT')
df_rootgo_fib = pd.read_table(
    './mesculenta_v6_output/root_fib_goatools.txt', comment='#')

print( 'GO count unfiltered: {}'.format(df_rootgo_fib.shape[0]))
print( 'Enriched GO count, FDR < 0.05: {}'.format(
    df_rootgo_fib[(df_rootgo_fib['p_fdr'] < 0.05) &
                  (df_rootgo_fib['enrichment'] == 'e')]
                ].shape[0] )
    )
print( 'Enriched GO count, FDR < 0.01: {}'.format(
    df_rootgo_fib[(df_rootgo_fib['p_fdr'] < 0.01) &
                  (df_rootgo_fib['enrichment'] == 'e')]
                ].shape[0] )
    )

print()

## goatools ANALYSIS:
# python ~/src/goatools/scripts/find_enrichment.py \
# --fdr --obo ~/src/goatools/go-basic.obo \
# goprep_diffexp_root_sto.txt goprep_bkgrnd_root.txt \
# Mesculenta_305_v6.1.annotation_info.go_only_uniq.txt \
# > root_sto_goatools.txt

### STORAGE ROOT
print('STORAGE ROOT')
df_rootgo_sto = pd.read_table(
    './mesculenta_v6_output/root_sto_goatools.txt', comment='#')

```

```

print( 'GO count unfiltered: {}'.format(df_rootgo_sto.shape[0]))
print( 'Enriched GO count, FDR < 0.05: {}'.format(
    df_rootgo_sto[(df_rootgo_sto['p_fdr'] < 0.05) &
        (df_rootgo_sto['enrichment'] == 'e')
    ].shape[0] )
)
print( 'Enriched GO count, FDR < 0.01: {}'.format(
    df_rootgo_sto[(df_rootgo_sto['p_fdr'] < 0.01) &
        (df_rootgo_sto['enrichment'] == 'e')
    ].shape[0] )
)

```

FIBROUS ROOT

```

GO count unfiltered: 414
Enriched GO count, FDR < 0.05: 139
Enriched GO count, FDR < 0.01: 135

```

STORAGE ROOT

```

GO count unfiltered: 177
Enriched GO count, FDR < 0.05: 24
Enriched GO count, FDR < 0.01: 4

```

```

In [41]: print('Genes Upregulated in Fibrous Root: {}'.format(
    df_volc[df_volc['log2(fold_change)'] > 0].shape[0])
)
print('Genes Upregulated in Storage Root'.format(
    df_volc[df_volc['log2(fold_change)'] < 0].shape[0])
)

```

```

Genes Upregulated in Fibrous Root: 2524
Genes Upregulated in Storage Root

```

```

In [42]: #####
    ## ROOTS #####
    #####

    lfc = 2
    on_thresh = 10
    off_thresh = 1

    with( sns.plotting_context('talk') ):
        plt.figure(figsize=(15,12))
        sns.set_style('darkgrid')

        g = sns.regplot( y='-log(q_value)',
            x='log2(fold_change)',
            data=df_volc_n,
            scatter=True,
            fit_reg=False
        )

```

```

g = sns.regplot( y='-log(q_value) ',
                 x='log2(fold_change) ',
                 data=df_volc,
                 scatter=True,
                 fit_reg=False
                 )

y_limit = (0,4)
x_limit = (-30,30)
g.axes.set_ylim(*y_limit)
g.axes.set_xlim(*x_limit)
g.set_title( 'Volcano Plot of Genes Differentially \
Expressed from Storage Root to Fibrous Root')

plt.plot( (lfc,lfc), (0,y_limit[1]), color='red', alpha = 0.4 )
plt.plot( (-lfc,-lfc), (0,y_limit[1]), color='red', alpha = 0.4 )
plt.plot( (x_limit[0], x_limit[1]), (1.3,1.3),
         linestyle = '--', color='red', alpha = 0.4 )

plt.savefig('./mesculenta_v6_output/volcano_diffexp_roots.pdf',
           bbox_inches='tight')

```



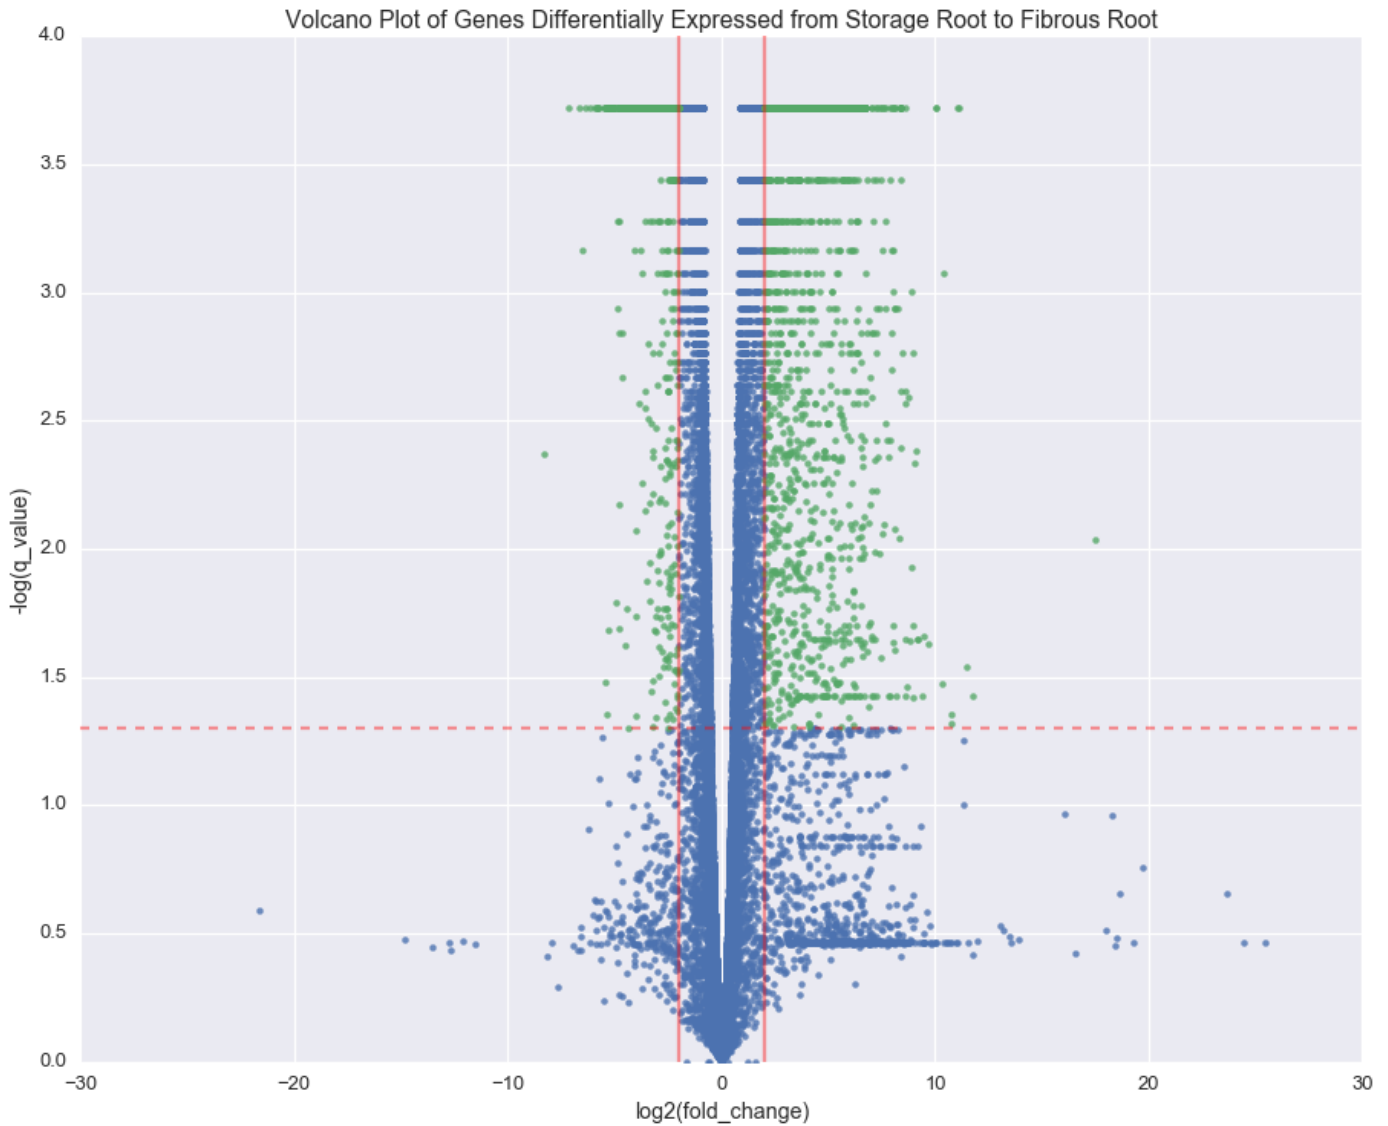

### 5.3 Fibrous Root and Leaf

#### 5.3.1 Differentially Expressed in Fibrous\_Root and Leaf

```
In [43]: #####
        ## ROOT/LEAF #####
        #####

lfc = 2
sig = 0.05
fpkm_cutoff = 1

# limit list of genes to significantly differentially
#     expressed with a abs(log2(fold_change)) value > 2
#     and an expression value of at least 1 FPKM in one of the tissues
df_volc = df_cuff[(df_cuff['sample_1'] == 'Leaf')
                  & (df_cuff['sample_2'] == 'Fibrous_Root')
                  & (df_cuff['q_value'] < sig )
```

```

& (np.abs(df_cuff['log2(fold_change)']) > lfc)
& ((df_cuff['value_1'] > fpkm_cutoff)
    | (df_cuff['value_2'] > fpkm_cutoff))
& (df_cuff['gene'] != '-')].merge( annot[['gene', 'annot']],
                                   how='inner',
                                   on='gene',
                                   copy=False)

df_volc_n = df_cuff[(df_cuff['sample_1'] == 'Leaf')
& (df_cuff['sample_2'] == 'Fibrous_Root')
& ((df_cuff['q_value'] >= sig )
    | (np.abs(df_cuff['log2(fold_change)']) <= lfc ))
& ((df_cuff['value_1'] > fpkm_cutoff)
    | (df_cuff['value_2'] > fpkm_cutoff))
& (df_cuff['gene'] != '-')].merge( annot[['gene', 'annot']],
                                   how='inner',
                                   on='gene',
                                   copy=False)

# write genes to file
df_volc.to_csv('./mesculenta_v6_output/diffexp_rootleaf.txt', sep='\t')

# calculate log score for volcano plot
df_volc['-log(q_value)'] = -np.log10(df_volc['q_value'])
df_volc_n['-log(q_value)'] = -np.log10(df_volc_n['q_value'])

print('Leaf vs Fibrous Root')
print('Differentially Expressed Genes: {}'.format(df_volc.shape[0]))

```

Leaf vs Fibrous Root  
Differentially Expressed Genes: 4884

```

In [44]: #####
## GO PREP
#####
df_volc[df_volc['log2(fold_change)'] > 2
        ]['gene'].drop_duplicates().to_csv(
        './mesculenta_v6_output/goprep_diffexp_rootleaf_fibroot.txt', index=False)

df_volc[df_volc['log2(fold_change)'] < -2
        ]['gene'].drop_duplicates().to_csv(
        './mesculenta_v6_output/goprep_diffexp_rootleaf_leaf.txt', index=False)

df_cuff[(df_cuff['sample_1'] == 'Leaf') &
        (df_cuff['sample_2'] == 'Fibrous_Root') &
        ((df_cuff['value_1'] > 1) | (df_cuff['value_2'] > 1)) &
        (df_cuff['gene'] != '-')
        ]['gene'].drop_duplicates().to_csv(
        './mesculenta_v6_output/goprep_bkgrnd_rootleaf.txt', index=False)

```

```

In [45]: #####
## goatools ANALYSIS:
# python ~/src/goatools/scripts/find_enrichment.py \

```

```

# --fdr --obo ~/src/goatools/go-basic.obo \
# goprep_diffexp_rootleaf_leaf.txt goprep_bkgrnd_rootleaf.txt \
# Mesculenta_305_v6.1.annotation_info.go_only_uniq.txt \
# > rootleaf_leaf_goatools.txt

## Process goatools output
### UPREGULATED IN LEAF
print( 'LEAF' )
df_rootgo = pd.read_table(
    './mesculenta_v6_output/rootleaf_leaf_goatools.txt', comment='#')

print( 'GO count unfiltered: {}'.format(df_rootgo.shape[0]))
print( 'Enriched GO count, FDR < 0.01: {}'.format(
    df_rootgo[(df_rootgo['p_fdr'] < 0.01) &
               (df_rootgo['enrichment'] == 'e')]
               ].shape[0] )
)
print( 'Enriched GO count, FDR < 0.001: {}'.format(
    df_rootgo[(df_rootgo['p_fdr'] < 0.001) &
               (df_rootgo['enrichment'] == 'e')]
               ].shape[0] )
)

print()

#####
## goatools ANALYSIS:
# python ~/src/goatools/scripts/find_enrichment.py \
# --fdr --obo ~/src/goatools/go-basic.obo \
# goprep_diffexp_rootleaf_fibroot.txt goprep_bkgrnd_rootleaf.txt \
# Mesculenta_305_v6.1.annotation_info.go_only_uniq.txt \
# > rootleaf_fibroot_goatools.txt

### UPREGULATED IN FIBROUS ROOT
print( 'FIBROUS ROOT' )
df_rootgo = pd.read_table(
    './mesculenta_v6_output/rootleaf_fibroot_goatools.txt', comment='#')

print( 'GO count unfiltered: {}'.format(df_rootgo.shape[0] ) )
print( 'Enriched GO count, FDR < 0.01: {}'.format(
    df_rootgo[(df_rootgo['p_fdr'] < 0.01) &
               (df_rootgo['enrichment'] == 'e')]
               ].shape[0] )
)
print( 'Enriched GO count, FDR < 0.001: {}'.format(
    df_rootgo[(df_rootgo['p_fdr'] < 0.001) &
               (df_rootgo['enrichment'] == 'e')]
               ].shape[0] )
)

```

```

LEAF
GO count unfiltered: 398
Enriched GO count, FDR < 0.01: 67

```

Enriched GO count, FDR < 0.001: 47

FIBROUS ROOT

GO count unfiltered: 408

Enriched GO count, FDR < 0.01: 97

Enriched GO count, FDR < 0.001: 88

```
In [46]: print('Genes Upregulated in Fibrous Root: {}'.format(
           df_volc[df_volc['log2(fold_change)'] > 0].shape[0])
         )
         print('Genes Upregulated in Leaf: {}'.format(
           df_volc[df_volc['log2(fold_change)'] < 0].shape[0])
         )
```

Genes Upregulated in Fibrous Root: 2446

Genes Upregulated in Leaf: 2438

```
In [47]: #####
         ## ROOT/LEAF #####
         #####

         lfc = 2
         on_thresh = 10
         off_thresh = 1

         with( sns.plotting_context('talk') ):
             plt.figure(figsize=(15,12))
             sns.set_style('darkgrid')

             g = sns.regplot( y='-log(q_value)',
                             x='log2(fold_change)',
                             data=df_volc_n,
                             scatter=True,
                             fit_reg=False
                             )

             g = sns.regplot( y='-log(q_value)',
                             x='log2(fold_change)',
                             data=df_volc,
                             scatter=True,
                             fit_reg=False
                             )

             y_limit = (0,4)
             x_limit = (-30,30)
             g.axes.set_ylim(*y_limit)
             g.axes.set_xlim(*x_limit)
             g.set_title( 'Volcano Plot of Genes Differentially \
Expressed from Leaf to Fibrous Root' )

             plt.plot( (lfc,lfc), (0,y_limit[1]), color='red', alpha = 0.4 )
```

```
plt.plot( (-lfc,-lfc), (0,y_limit[1]), color='red', alpha = 0.4 )
plt.plot( (x_limit[0], x_limit[1]), (1.3,1.3),
          linestyle = '--', color='red', alpha = 0.4 )

plt.savefig('./mesculenta_v6_output/volcano_diffexp_rootleaf.pdf',
            bbox_inches='tight')
```

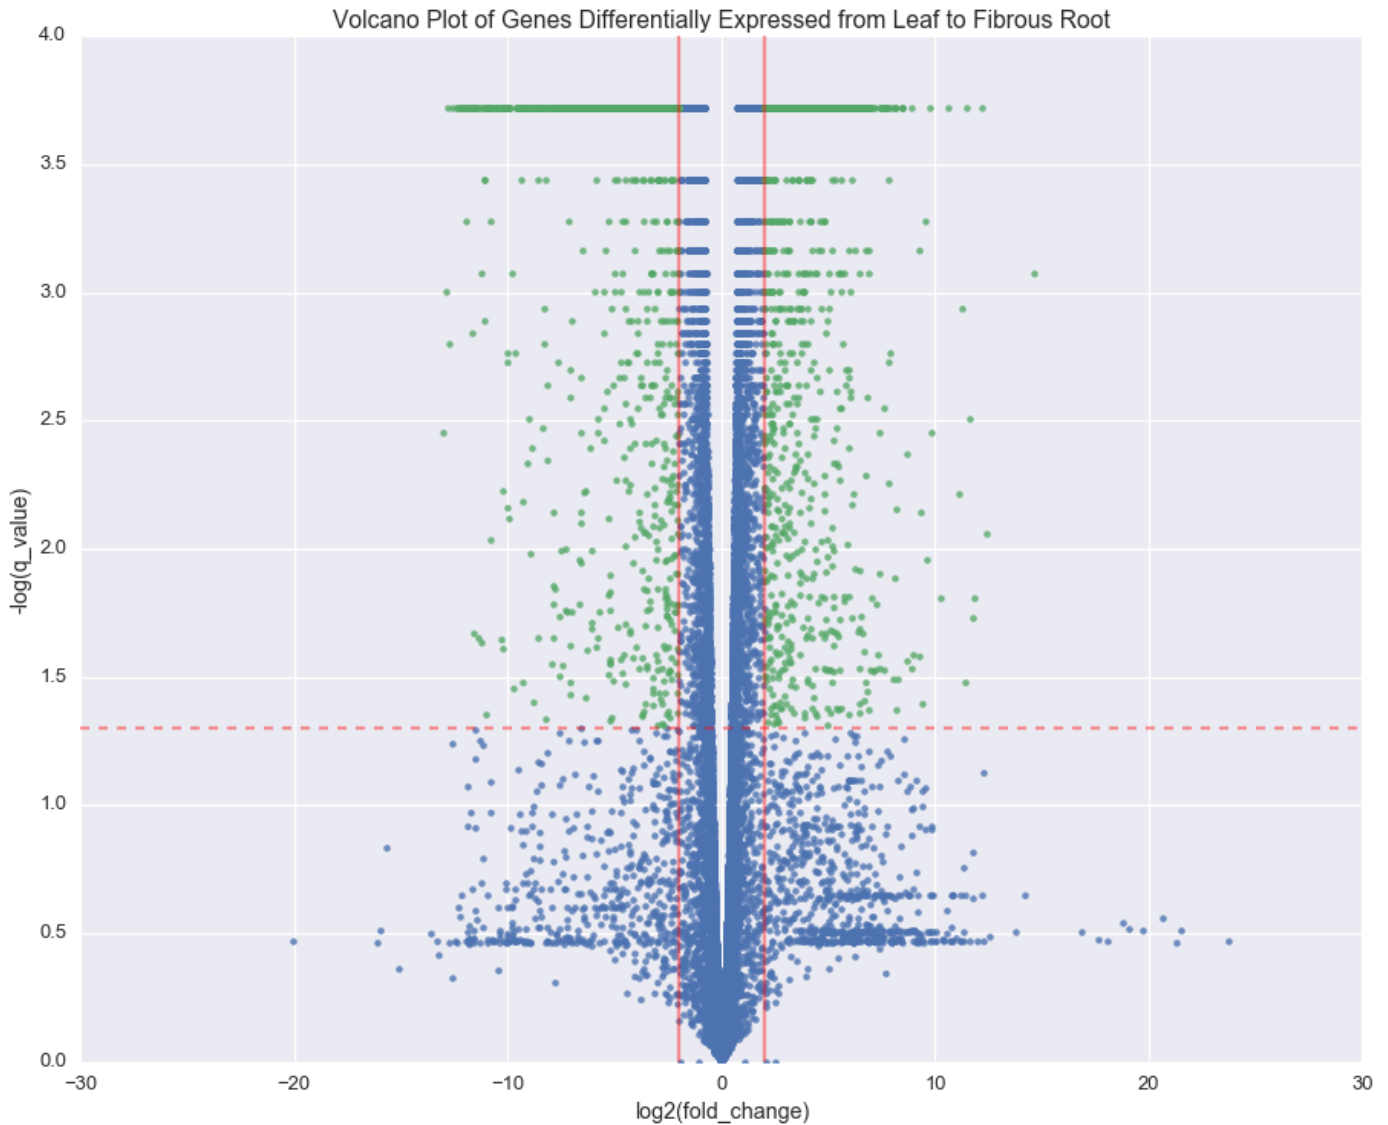

## 6 Similarly Expressed Genes

```
In [48]: genes_rgt_sim = genes_rgt_piv.copy()
```

```
# limit to genes with a minimum expression of 40 FPKM in all samples
genes_rgt_sim = genes_rgt_sim[(genes_rgt_sim.min(axis=1) >= 40)]
```

```
# calculate Coefficient of Variation
```

```
genes_rgt_sim['CoV'] = genes_rgt_sim.std(axis=1) / genes_rgt_sim.mean(axis=1)
```

```
print( 'Gene Count: {}'.format( genes_rgt_sim.shape[0] ) )
```

```
# display top ten genes sorted by Coefficient of Variation
genes_rgt_sim.sort_values('CoV').columns
```

Gene Count: 994

```
Out[48]: Index(['FEC0', 'FEC1', 'FEC2', 'Fibrous_Root0', 'Fibrous_Root1',
               'Fibrous_Root2', 'Lateral_Bud0', 'Lateral_Bud1', 'Lateral_Bud2',
               'Leaf0', 'Leaf1', 'Leaf2', 'Mid_Vein0', 'Mid_Vein1', 'Mid_Vein2',
               'OES0', 'OES1', 'OES2', 'Petiole0', 'Petiole1', 'Petiole2', 'RAM0',
               'RAM1', 'RAM2', 'SAM0', 'SAM1', 'SAM2', 'Stem0', 'Stem1', 'Stem2',
               'Storage_Root0', 'Storage_Root1', 'gene', 'go', 'TAIR', 'annot',
               'gene_id', 'CoV'],
              dtype='object', name='pivot')
```

```
In [49]: # get functional annotations for top ten similarly
         # expressed as sorted by Coefficient of Variation
sim_genes = genes_rgt_sim.sort_values('CoV').head(10)['gene']
sim_genes = sim_genes.to_frame().merge(annot.loc[:, ['gene', 'annot']],
                                       how='left', on='gene')
```

```
sim_genes
```

```
Out[49]:
```

|   | gene            | annot                                             |
|---|-----------------|---------------------------------------------------|
| 0 | Manes.01G240900 | RNA-binding (RRM/RBD/RNP motifs) family protein   |
| 1 | Manes.01G054500 | subunit of exocyst complex 8                      |
| 2 | Manes.06G055400 | SIT4 phosphatase-associated family protein        |
| 3 | Manes.02G019200 | PLAC8 family protein                              |
| 4 | Manes.06G073900 | decapping 5                                       |
| 5 | Manes.16G049900 | cytochrome c oxidase assembly protein CtaG / C... |
| 6 | Manes.16G093200 | RNA-binding (RRM/RBD/RNP motifs) family protein   |
| 7 | Manes.11G162700 | Transducin/WD40 repeat-like superfamily protein   |
| 8 | Manes.09G156800 | Sec23/Sec24 protein transport family protein      |
| 9 | Manes.10G094300 | NaN                                               |

```
In [50]: # select expression values for 3 previously used housekeeping genes
genes_rgt_hskp = pd.concat([
    genes_rgt_sim.sort_values('CoV').head(10).drop('CoV', axis=1),
    genes_rgt_piv[genes_rgt_piv['gene'].isin(['Manes.07G019300',
                                             'Manes.09G086600',
                                             'Manes.09G039900'])
])

# calculate Coefficient of Variation
genes_rgt_hskp['CoV'] = genes_rgt_hskp.std(axis=1) / genes_rgt_hskp.mean(axis=1)
genes_rgt_hskp = genes_rgt_hskp.sort_values('CoV')

# write to file
genes_rgt_hskp.to_csv(
    './mesculenta_v6_output/similar_exp_gene_annot_table.txt', sep='\t')
```

```
genes_rgt_hskp.loc[:,['annot']].to_csv(
    './mesculenta_v6_output/similar_exp_gene_annotonly.txt', sep='\t')
```

```
genes_rgt_hskp.columns
```

```
Out[50]: Index(['FEC0', 'FEC1', 'FEC2', 'Fibrous_Root0', 'Fibrous_Root1',
               'Fibrous_Root2', 'Lateral_Bud0', 'Lateral_Bud1', 'Lateral_Bud2',
               'Leaf0', 'Leaf1', 'Leaf2', 'Mid_Vein0', 'Mid_Vein1', 'Mid_Vein2',
               'OES0', 'OES1', 'OES2', 'Petiole0', 'Petiole1', 'Petiole2', 'RAM0',
               'RAM1', 'RAM2', 'SAM0', 'SAM1', 'SAM2', 'Stem0', 'Stem1', 'Stem2',
               'Storage_Root0', 'Storage_Root1', 'gene', 'go', 'TAIR', 'annot',
               'gene_id', 'CoV'],
              dtype='object', name='pivot')
```

```
In [51]: # get top 10 genes sorted by Coefficient of Variation for plotting
df_plot = genes_rgt_hskp.set_index('gene').iloc[:, :32]
```

```
with( sns.plotting_context( 'talk' ) ):
    plt.figure(figsize=(25,6))
    sns.set_style('darkgrid')
```

```
g = sns.heatmap(data=df_plot,
                cmap='Blues', annot=True, fmt='.0f', vmax=300)
```

```
g.set_ylabel('Gene')
g.set_xlabel('Tissue Type')
g.set_title('Expression of Proposed and Used Housekeeping \
Genes in Various Tissue Types')
```

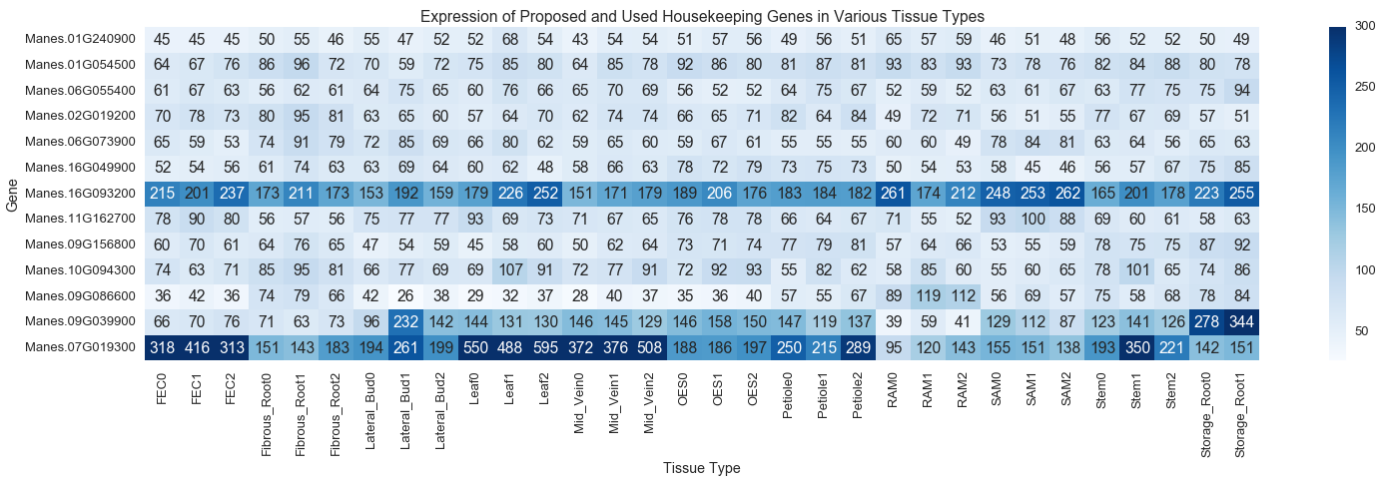

```
In [52]: df_plot = genes_rgt_hskp.copy()
df_plot = df_plot.drop(['annot',
                        'TAIR',
                        'go',
                        'gene_id',
                        'CoV'], axis=1).set_index('gene')
```

```
# plot distribution of gene expression across all samples of top most
```

```

# similarly expressed genes and 3 previously used housekeeping genes
with( sns.plotting_context( 'talk' ) ):
    plt.figure(figsize=(15,10))
    sns.set_style('darkgrid')

    g = sns.boxplot(data=df_plot.transpose())
    g.set_ylabel('Expression')
    g.set_xlabel('Gene')
    g.set_title('Distribution of Expression Values of Potential \
Housekeeping Genes Across 11 Tissue Types')
    g.set_xticklabels(df_plot.index, rotation=40)

    plt.savefig('./mesculenta_v6_output/similar_exp_allsamp_cov_dist.pdf',
                bbox_inches='tight')

```

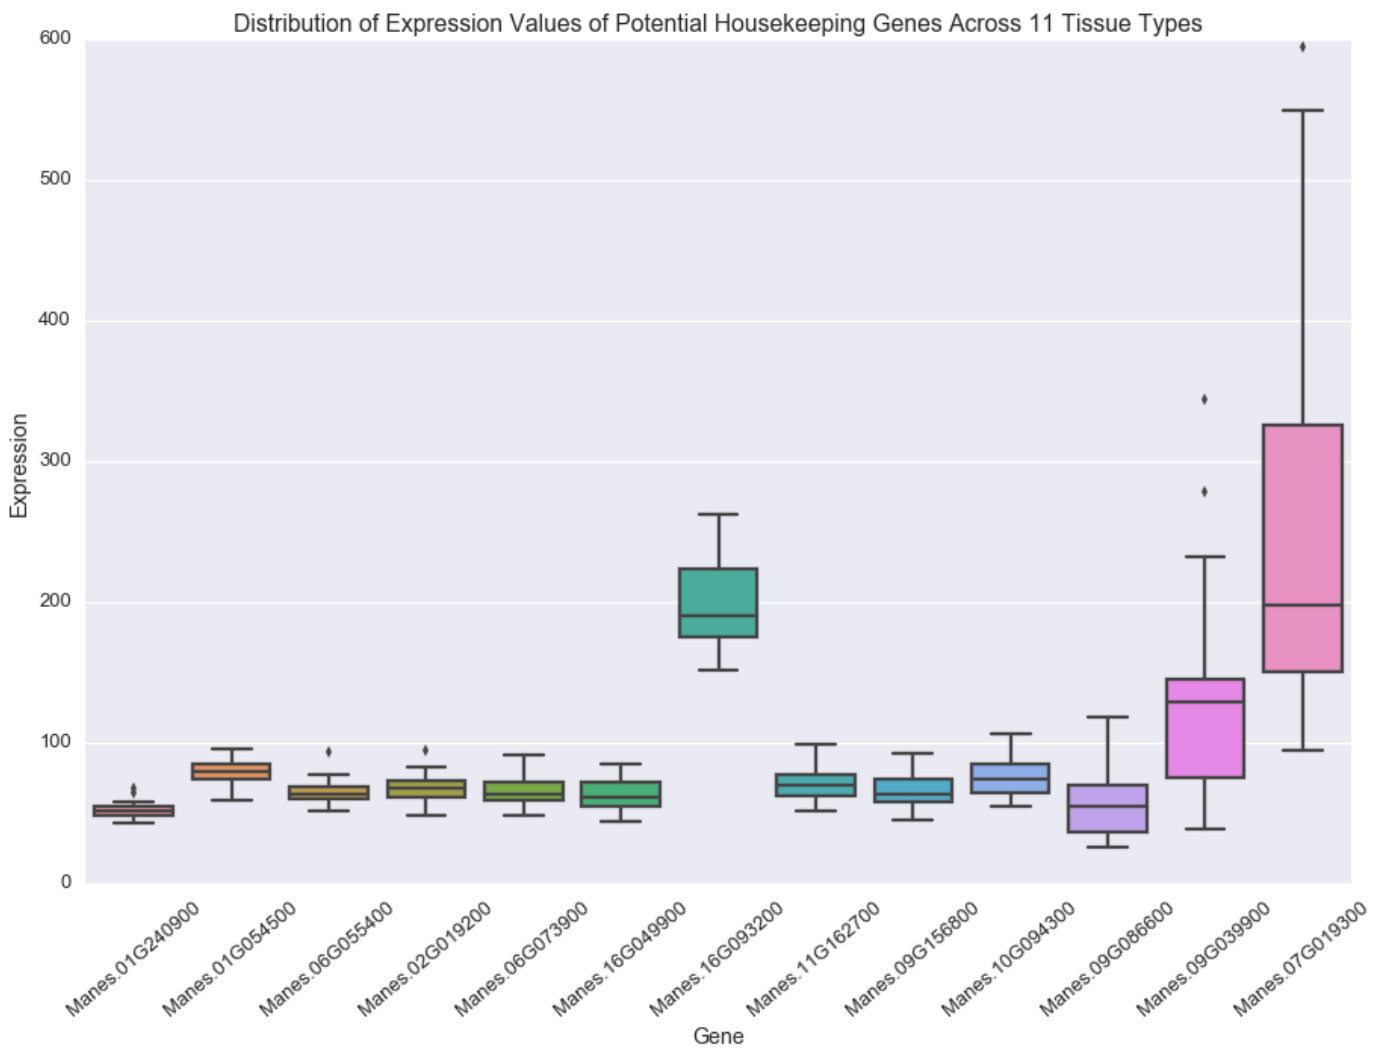

In [ ]:
